1 **Charting the metabolic landscape of the facultative**  
2 **methylotroph *Bacillus methanolicus***

3

4 Baudoin Delépine<sup>a</sup>, Marina Gil López<sup>b</sup>, Marc Carnicer<sup>a\*</sup>, Cláudia M. Vicente<sup>a</sup>,

5 Volker F. Wendisch<sup>b</sup>, Stéphanie Heux<sup>a#</sup>

7 <sup>a</sup> TBI, Université de Toulouse, CNRS, INRA, INSA, Toulouse, France.

8 <sup>b</sup> Genetics of Prokaryotes, Faculty of Biology & CeBiTec, Bielefeld University,

9 Bielefeld, Germany

10

11 Running Head: Metabolic states of the methylotroph *B. methanolicus*

12

13 # Address correspondence to SH, [heux@insa-toulouse.fr](mailto:heux@insa-toulouse.fr)

14 Post: TBI - INSA de Toulouse, 135 avenue de Rangueil, 31077 Toulouse CEDEX

15 04; Phone number: +33 (0)5 61 55 93 55

16 \* Present address: IQS, Universitat Ramon Llull, Via Augusta 390, E-08017,

17 Barcelona, Spain

18

## 19 **ACKNOWLEDGEMENT**

20 MetaToul ([www.metatoul.fr](http://www.metatoul.fr)), which is part of MetaboHub (ANR-11-INBS-0010,  
21 [www.metabohub.fr](http://www.metabohub.fr)) are gratefully acknowledged for their help in collecting,  
22 processing and interpreting 13-C NMR and MS data. We would like to thank  
23 Marcus Persicke, Maud Heuillet, Edern Cahoreau, Lindsay Periga, Pierre  
24 Millard, Gilles Vieira and Jean-Charles Portais for the insights they provided.

25

## 26 **FUNDING**

27 This work was supported by ERA-CoBioTech's project C1Pro (ANR-17-COBI-  
28 0003-05 and FNR-22023617).

## 29 **ABSTRACT**

### 30 **Abstract**

31 *Bacillus methanolicus* MGA3 is a thermotolerant and relatively fast-growing  
32 methylotroph able to secrete large quantities of glutamate and lysine. These  
33 natural characteristics make *B. methanolicus* a good candidate to become a  
34 new industrial chassis organism, especially in a methanol-based economy.  
35 This has motivated a number of omics studies of *B. methanolicus* at the  
36 genome, transcript, protein and metabolic levels. Intriguingly, the only  
37 substrates known to support *B. methanolicus* growth as sole source of carbon  
38 and energy are methanol, mannitol, and to a lesser extent glucose and  
39 arabitol. We hypothesized that comparing methylotrophic and non-  
40 methylotrophic metabolic states at the flux level would yield new insights  
41 into MGA3 metabolism. <sup>13</sup>C metabolic flux analysis (<sup>13</sup>C-MFA) is a powerful  
42 computational method to estimate carbon flows from substrate to biomass  
43 (i.e. the *in vivo* reaction rates of the central metabolic pathways) from  
44 experimental labeling data. In this study, we designed and performed a <sup>13</sup>C-  
45 MFA of the facultative methylotroph *B. methanolicus* MGA3 growing on  
46 methanol, mannitol and arabitol to compare the associated metabolic states.  
47 The results obtained validate previous findings on the methylotrophy of  
48 *B. methanolicus*, allowed us to characterize the assimilation pathway of one  
49 of the studied carbon sources, and provide a better overall understanding of  
50 this strain.

## 51 **Importance**

52 Methanol is cheap, easy to transport and can be produced both from  
53 renewable and fossil resources without mobilizing arable lands. As such, it is  
54 regarded as a potential carbon source to transition toward a greener  
55 industrial chemistry. Metabolic engineering of bacteria and yeast able to  
56 efficiently consume methanol is expected to provide cell factories that will  
57 transform methanol into higher-value chemicals in the so-called methanol  
58 economy. Toward that goal, the study of natural methylotrophs such as  
59 *B. methanolicus* is critical to understand the origin of their efficient  
60 methylotrophy. This knowledge will then be leveraged to transform such  
61 natural strains into new cell factories, or to design methylotrophic capability  
62 in other strains already used by the industry.

## 63 **KEYWORDS**

64 Natural methylotrophy, <sup>13</sup>C metabolic flux analysis, non-stationary MFA,  
65 *Bacillus methanolicus* MGA3, methanol

66

## 67 **Abbreviations**

68 <sup>13</sup>C-MFA: <sup>13</sup>C metabolic flux analysis; CID: carbon isotopologue distribution;

69 FBA: Flux Balance Analysis; MS: mass spectrometry; NMR: nuclear magnetic

70 resonance; PTS: phosphotransferase system

71 Pathways

72 SBPase: fructose biphosphate aldolase/sedoheptulose biphosphatase; TA:

73 fructose biphosphate aldolase/transaldolase; PPP: pentose phosphate

74 pathway; RuMP: Ribulose Monophosphate Cycle; TCA: Krebs cycle

75 Reactions

76 akgdh: 2-oxoglutarate dehydrogenase and 2-oxoglutarate synthase; Araupt:

77 arabitol uptake; detox: linear detoxification pathways; fum: fumarate

78 reductase; glpx: sedoheptulose-biphosphatase; gnd: phosphogluconate

79 dehydrogenase; hps: 3-hexulose-6-phosphate synthase ; idh: isocitrate

80 dehydrogenase; Manupt: mannitol uptake; mdh: methanol dehydrogenase;

81 pdh: pyruvate dehydrogenase; pfk: 6-phosphofructokinase and fructose-

82 biphosphatase; pgi: glucose 6-phosphate isomerase ; pgk: glyceraldehyde

83 3-phosphate dehydrogenase, phosphoglycerate kinase, and

84 phosphoglycerate mutase; phi: 6-phospho-3-hexuloisomerase ; pyk: pyruvate

85 kinase; rpe: ribulose-phosphate 3-epimerase; rpi: ribose 5-phosphate

86 isomerase; rpi: ribulose phosphate isomerase; ta: transaldolase; tkt1, tkt2:

87 transketolases; zwf: glucose-6-phosphate dehydrogenase and 6-

88 phosphogluconolactonase.

## 89 Metabolites

90 Ace: acetate; Aco: aconitate; AKG: 2-oxoglutarate; ala: alanine; Ara: arabitol;  
91 arg: arginine; asp: aspartate; Cit: citrate; DHAP: dihydroxyacetone  
92 phosphate; Ery4P: erythrose 4-phosphate; For: formaldehyde; Fru6P: fructose  
93 6-phosphate; FruBP: fructose 1,6-bisphosphate; Fum: fumarate; G3P: 3-  
94 phospho-D-glycerate; GAP: glyceraldehyde 3-phosphate; Glc6P: glucose 6-  
95 phosphate; glu: glutamate; gly: glycine; GlyOx: glyoxylate; Gnt6P: 6-  
96 phosphogluconate; Hex6P: hexulose 6-phosphate; his: histidine; ile:  
97 isoleucine; leu: leucine; lys: lysine; Mal: malate; Man: mannitol; MeOH:  
98 methanol; met: methionine; OAA: oxaloacetate; PEP: phosphoenolpyruvate;  
99 PGA: 2-phospho-D-glycerate; phe: phenylalanine; pro: proline; Pyr: pyruvate;  
100 Rib5P: ribose 5-phosphate; Ribu5P: ribulose 5-phosphate; Sed7P:  
101 sedoheptulose 7-phosphate; ser: serine; Suc: succinate; thr: threonine; tyr:  
102 tyrosine; val: valine; Xyl5P: xylulose 5-phosphate.

103

## 104 **1. INTRODUCTION**

105  $^{13}\text{C}$  metabolic flux analysis ( $^{13}\text{C}$ -MFA) has emerged in the last decade as an  
106 outstanding experimental method to describe the metabolic states of  
107 microorganisms. It has successfully been used to identify new pathways (1),  
108 investigate responses to environmental changes (2), improve the titer of cell  
109 factories (3), screen strains based on their enzymatic capacity (4), and more  
110 generally to provide a better understanding of the metabolism of  
111 microorganisms (5) such as methylotrophs (6–8). Briefly,  $^{13}\text{C}$ -MFA exploits a  
112 metabolic model and  $^{13}\text{C}$ -isotope patterns measured from key metabolites to  
113 estimate reaction rates consistent with the observed labeling patterns (see  
114 (9, 10) for reviews). Specifically, cells are grown on a  $^{13}\text{C}$  labeled carbon  
115 source, metabolites of the central metabolism or constituents of the biomass  
116 such as proteinogenic amino acids are sampled and quenched, and their  
117 carbon isotopologue (i.e. labeling) distribution (CID) is measured by mass  
118 spectrometry (MS) and/or nuclear magnetic resonance (NMR). A metabolic  
119 model is then used to fit these measurements to theoretical CID data that  
120 are simulated by optimizing reaction flux values from the metabolic model.  
121 Assuming mass balance, if the measurements are coherent and the topology  
122 of the metabolic model is correct, the experimental and simulated data will  
123 converge, yielding the estimated reaction fluxes. Finally,  $^{13}\text{C}$ -MFA provides a  
124 flux map: a predicted snapshot of the metabolic fluxes through the organism  
125 of interest during the experiment, i.e. its metabolic state.  $^{13}\text{C}$ -MFA flux maps  
126 are conceptually similar to those from flux balance analysis (FBA), a purely *in*

127 *in silico* method that, from a metabolic model (typically at the genome scale),  
128 computes the optimal reaction flux distribution to maximize an objective  
129 defined in terms of metabolite production, often designed to model cell  
130 growth. Importantly, <sup>13</sup>C-MFA flux maps are estimates based on experimental  
131 data, whereas FBA flux maps are purely *in silico* predictions, which can be  
132 confirmed by gene deletion analysis or <sup>13</sup>C-MFA for example.

133 *Bacillus methanolicus* MGA3 is a gram-positive bacterium that was first  
134 isolated in the 1990s from freshwater marsh soil samples after an  
135 enrichment culture on methanol at 55 °C (11). Its ability to grow quickly and  
136 to secrete large quantities of glutamate and lysine in methanol at high  
137 temperature make it a good candidate for biotech applications. Methanol is  
138 indeed viewed as a promising renewable feedstock because of its abundance  
139 and low price (12, 13), while high temperature cultures are less prone to  
140 contamination and require less cooling when scaled up (14). Furthermore,  
141 *B. methanolicus* is able to grow in seawater, which is also cheap and  
142 abundant (15). Promising metabolic engineering studies have already  
143 established MGA3 as a cell factory for the heterologous production of  
144 cadaverine (16) and GABA (17). While the lack of genetic tools must have  
145 impaired the development of new applications in the past (18), the  
146 establishment of gene expression tools based on theta- and rolling-circle  
147 replicating plasmids have made *B. methanolicus* amenable to the  
148 overproduction of amino acids and their derivatives (19), and there is hope  
149 that recent breakthroughs from CRISPR interference (CRISPRi) will stimulate  
150 new innovations (20).



151 As a facultative methylotroph, *B. methanolicus* MGA3 can also grow on non-  
152 methylotrophic substrates such as D-mannitol, D-glucose and D-arabitol. The  
153 metabolic pathways involved in the uptake of mannitol and glucose have  
154 been described (21), as has the organization of genes involved in mannitol  
155 utilization (19). Both substrates enter the cells via a phosphotransferase  
156 system (PTS), respectively as mannitol 1-phosphate and glucose 6-  
157 phosphate, and are further converted to fructose 6-phosphate. Arabitol has  
158 recently been characterized as a fourth source of carbon and energy for  
159 *B. methanolicus* (22). The operon responsible for arabitol assimilation was  
160 identified as harboring a PTS system (AtIABC) and two putative arabitol  
161 phosphate dehydrogenases (AtID and AtIF), whose activities were  
162 demonstrated in crude extracts. However, as the pathway was not  
163 completely characterized, it is unclear whether arabitol is assimilated  
164 through arabitol 1-phosphate to xylulose 5-phosphate (Xyl5P), or to ribulose  
165 5-phosphate (Rib5P) through arabitol 5-phosphate. It has been suggested  
166 that both routes operate in parallel in *Enterococcus avium* and other gram-  
167 positive bacteria (23). A series of omics studies comparing these carbon  
168 sources with methanol have contributed to a better understanding of  
169 *B. methanolicus* metabolism at the genome (21, 24), transcriptome (21, 22,  
170 25), proteome (26) and metabolome levels (27, 28). However, a flux level  
171 description, which could validate previous findings and provide new insights  
172 into the facultative methylotrophy of *B. methanolicus* and its associated  
173 metabolic states, is still lacking.

174 In this study, we designed and performed  $^{13}\text{C}$ -MFA of the facultative  
175 methylotroph *Bacillus methanolicus* MGA3 growing on methanol, mannitol  
176 and arabitol. Methanol ( $\text{CH}_4\text{O}$ ) and mannitol ( $\text{C}_6\text{H}_{14}\text{O}_6$ ) are the best known  
177 carbon sources for this strain (11, 14), with comparable growth rates; while  
178 growth on arabitol ( $\text{C}_5\text{H}_{12}\text{O}_5$ ) is significantly slower (22) and its assimilation  
179 pathway has not yet been fully described. All three carbon sources are  
180 probably present in MGA3's natural habitats, on plant leaves (29) or as plant  
181 degradation products (30). With their wide availability and fast associated  
182 growth rate, methanol and mannitol are promising feedstocks for industrial  
183 applications, while arabitol growth allows the facultative methylotrophy of  
184 MGA3 to be studied with a less efficient C source and to finish characterizing  
185 its assimilation pathway.

186

## 187 **2. MATERIALS & METHODS**

### 188 **2.1 Strain**

189 *B. methanolicus* wild-type MGA3 (ATCC 53907) strain was used for metabolic  
190 flux analyses. Strains used for cloning and expression are described in the  
191 section 2.5.1 and listed in Table 1.

### 192 **2.2 Non-stationary <sup>13</sup>C fluxomics experiment**

#### 193 **2.2.1 Culture conditions and parameters**

194 For the carbon source methanol, two batch cultures were performed in 0.5  
195 litre bioreactors (INFORS HT Multifors, The Netherlands) with a working  
196 volume of 0.40 litres coupled to a Dycor ProLine Process Mass Spectrometer  
197 (AMETEK Process Instruments, USA). The culture medium per litre was:  
198 3.48 g Na<sub>2</sub>HPO<sub>4</sub>·12 H<sub>2</sub>O, 0.606 g KH<sub>2</sub>PO<sub>4</sub>, 2.5 g NH<sub>4</sub>Cl, 0.048 g yeast extract,  
199 1 ml of 1 M MgSO<sub>4</sub> solution, 1 ml of trace salt solution, 1 ml of vitamins  
200 solution, 0.05 ml Antifoam 204 and 150 mM of methanol. The trace salt  
201 solution per litre was: 5.56 g FeSO<sub>4</sub>·7 H<sub>2</sub>O, 0.027 g CuCl<sub>2</sub>·2 H<sub>2</sub>O, 7.35 CaCl<sub>2</sub>·2  
202 H<sub>2</sub>O, 0.040 g CoCl<sub>2</sub>·6 H<sub>2</sub>O, 9.90 g MnCl<sub>2</sub>·4 H<sub>2</sub>O, 0.288 g ZnSO<sub>4</sub>·7 H<sub>2</sub>O and  
203 0.031 g H<sub>3</sub>BO<sub>3</sub>. The vitamin solution per litre was: 0.10 g D-biotin, 0.10 g  
204 thiamine·HCl, 0.10 g riboflavin, 0.10 g pyridoxine·HCl, 0.10 g pantothenate,  
205 0.10 g nicotinamide, 0.02 g p-aminobenzoic acid, 0.01 g folic acid, 0.01 g  
206 vitamin B12 and 0.01 g lipoic acid. The pre-cultures were grown in two half

207 litre shake flasks containing 150 ml of the pre-culture medium and inoculated  
208 with cryostock of *B. methanolicus* wild-type MGA3 cells. The cultures were  
209 grown overnight at 50 °C under shaking at 200 rpm, and used to inoculate  
210 the reactors. The aeration rate of 1 vvm was controlled by a mass flow meter  
211 (INFORS HT Multifors, The Netherlands) and pO<sub>2</sub> were maintained above  
212 25 % throughout all cultures. Temperature, pH and stirring speed were  
213 maintained at 50 °C, pH 6.8 (with KOH 1 M) and 800 rpm, respectively. The  
214 N<sub>2</sub>, O<sub>2</sub>, Argon, CO<sub>2</sub>, <sup>13</sup>C-CO<sub>2</sub> and methanol concentrations in the bioreactors  
215 off-gas were measured on-line with the mass spectrometer.

216 To perform the pulse of tracer, 100 mM of <sup>13</sup>C-methanol (99 % <sup>13</sup>C; Euriso-Top,  
217 France) were added to the cultures at an OD<sub>600</sub> of 2.5. Growth curves are  
218 available in Supplementary Data 1.

### 219 **2.2.2 Quantification of cells and supernatant NMR analysis**

220 For determination of the dry weight of cells, a conversion factor of 0.389 g/l  
221 (dry weight) of cells per OD<sub>600</sub> unit was used. Supernatant samples were  
222 taken to analyse substrate methanol consumption as well as by-product  
223 formation by subtracting 1 ml of culture and centrifuged it at 13000 × g for  
224 60 s. Thereafter, supernatant was collected and stored until analysis at -20  
225 °C. Supernatant analysis was performed by <sup>1</sup>H 1D-NMR at 292 °K, using a 30°  
226 pulse and a relaxation delay of 20 s, with an Avance 800 MHz spectrometer  
227 (Bruker, Germany). Deuterated trimethylsilyl propionate (TSP-d<sub>4</sub>) was used  
228 as an internal standard for quantification.

### 229 **2.2.3 Sampling and MS analysis of intra and extracellular** 230 **pool sizes**

231 When the cultures reached an OD<sub>600</sub> of 2, metabolome samples were  
232 collected using the optimized method described by (28). Briefly, total broth  
233 quenching with correction for metabolites in the extracellular medium was  
234 performed in quadruplicates to assess the metabolite pool sizes in the two  
235 cultivations performed. Metabolites pool sizes were quantified (Fig. S1) by ion  
236 chromatography tandem mass spectrometry (IC-MS/MS) using cell extract of  
237 *Escherichia coli*, cultivated on 99 % [<sup>13</sup>C<sub>6</sub>] glucose (Euroisotop, France), as  
238 internal standard (31). Liquid anion exchange chromatography was  
239 performed as described previously (32).

### 240 **2.2.4 Sampling and MS analysis of labeled metabolites**

241 Label enrichments in the intracellular metabolites were followed after  
242 performing a pulse of 100 mM <sup>13</sup>C-methanol at an OD<sub>600</sub> 2.5. Whole broth  
243 (internal + external pools; WB) and culture filtrate (external pools; CF) were  
244 sampled to indirectly track label incorporation in the intracellular  
245 metabolites. Specifically, 13 WB and 3 CF samples were collected in 3.5 min  
246 in each bioreactor. Exact sampling times can be seen in Supplementary Data  
247 1. IC-MS/MS quantification was used to analyse the isotopologues of each  
248 metabolite as described by (32). The metabolites analysed were PEP,  
249 Rib5P+Ribu5P+Xyl5P, Sed7P, Gnt6P, Glc6P, FruBP, Fru6P, Gly3P, 13PG,  
250 G3P+PGA, Cit, Aco, Fum, Mal and Suc. After manual peak integration, the raw  
251 peak areas were corrected for the contribution of all naturally abundant

252 isotopes using IsoCor software (33). Some cross-contamination was found in  
253 the isotopologues M4 of Aco and M2 and M3 of Gnt6P that were subsequently  
254 removed from the analysis (Supplementary Data 1).

255 Additionally, the exact ratio between  $^{13}\text{C}$ -methanol and  $^{12}\text{C}$ -methanol after  
256 the pulse was measured by  $^1\text{H}$  1D-NMR as well as the evolution of  $^{12}\text{CO}_2$  and  
257  $^{13}\text{CO}_2$  by the mass gas analyser.

## 258 **2.2.5 Mass balance**

259 Experimental data consistency of the measured rates was verified using  
260 standard data reconciliation procedures under the elemental mass balance  
261 constraints (34). The biomass elemental composition used in the  
262 reconciliation procedure was taken from the closely related non-  
263 methylotrophic bacterium *Bacillus subtilis*,  $\text{CH}_{1.646}\text{N}_{0.219}\text{O}_{0.410}\text{S}_{0.005}$  (35, 36). The  
264 ashes content were considered to be 6 % of the dry cell weight, average  
265 value obtained from different microorganisms (i.e. *Escherichia coli*,  
266 *Aspergillus niger*, *Penicillium chrysogenum*, *Klebsiella aerogenes* (37)).  
267 After no proof of mismatch in the measurements, a better estimation of the  
268 physiological parameters were obtained as described by (34).

## 269 **2.3 Stationary $^{13}\text{C}$ fluxomics experiments**

### 270 **2.3.1 Culture conditions**

271 For the carbon sources mannitol and arabitol, the culture medium  
272 composition remained unchanged. The experiments were performed in

273 500 ml baffled shake flasks using 40 ml of media, and cells were grown at  
274 50 °C and 200 rpm. Pre-cultures contained yeast extract and 15 mM  
275 unlabeled mannitol or arabitol. They were inoculated as stated previously  
276 and grown overnight. The pre-cultures were used to inoculate triplicate main  
277 cultures to an OD<sub>600</sub> of 0.05, after centrifugation and re-suspension in media  
278 without yeast extract. The media to perform the <sup>13</sup>C MFA contained 15 mM  
279 [1-<sup>13</sup>C] mannitol, 15 mM [5-<sup>13</sup>C] arabitol or 15 mM of a mixture of 10 % [1-<sup>13</sup>C]  
280 arabitol and 90 % [2-<sup>13</sup>C] arabitol (99 % <sup>13</sup>C; Omicron Biochemicals, Inc.,  
281 South Bend, IN, USA). An experimentally determined conversion factor of  
282 0.22 g/litre (dry weight) of cells per OD<sub>600</sub> unit was used. Growth curves are  
283 available in Supplementary Data 1.

### 284 **2.3.2 Measurements of proteinogenic amino acids <sup>13</sup>C-** 285 **isotopologues**

286 Mannitol (resp. arabitol) cultures were sampled around 10 h (resp. 30 h) once  
287 they reached an OD<sub>600</sub> of 1.3. The pellets obtained from the cellular extract  
288 were hydrolyzed 15 h at 110 °C with 500 µl HCL 6N. Samples were  
289 evaporated and washed twice with 500 µl of ultrapure water, evaporated to  
290 dryness, resuspended (625 µl, water), and diluted (1/1000, water) for the  
291 mass spectrometry analysis.

292 Amino acids were separated on a PFP column (150 × 2.1 mm i.d., particle  
293 size 5 µm; Supelco Bellefonte, PEN, USA). Solvent A was 0.1 % formic acid in  
294 H<sub>2</sub>O and solvent B was 0.1 % formic acid in acetonitrile at a flow rate of  
295 250 µL/min. The gradient was adapted from the method used by (38).

296 Solvent B was varied as follows: 0 min, 2 %; 2 min, 2 %; 10 min, 5 %; 16 min,  
297 35 %; 20 min, 100 %; and 24 min, 100 %. The column was then equilibrated  
298 for 6 min at the initial conditions before the next sample was analyzed. The  
299 volume of injection was 20  $\mu$ L.

300 High-resolution experiments were performed with an Ultimate 3000 HPLC  
301 system (Dionex, CA, USA) coupled to an LTQ Orbitrap Velos mass  
302 spectrometer (Thermo Fisher Scientific, Waltham, MA, USA) equipped with a  
303 heated electrospray ionization probe. MS analyses were performed in  
304 positive FTMS mode at a resolution of 60 000 (at 400 m/z) in full-scan mode,  
305 with the following source parameters: the capillary temperature was 275 °C,  
306 the source heater temperature, 250 °C, the sheath gas flow rate, 45 a.u.  
307 (arbitrary unit), the auxiliary gas flow rate, 20 a.u., the S-Lens RF level, 40 %,  
308 and the source voltage, 5 kV. Isotopic clusters were determined by extracting  
309 the exact mass of all isotopologues, with a tolerance of 5 ppm. Experimental  
310 CIDs of alanine, glycine, valine, serine, threonine, phenylalanine, aspartate,  
311 glutamate, histidine, isoleucine, leucine, lysine, arginine, tyrosine, proline  
312 and methionine were obtained after correction of raw MS data for naturally  
313 occurring isotopes other than carbon, using IsoCor (33).

314 Careful inspection of the CID revealed an overall excellent reproducibility  
315 between both the technical and biological replicates (Supplementary Data 1).  
316 However, M0 of valine and M0-M1 of glycine had a higher variability which  
317 could be due to a signal closer to the noise level.



### 318 2.3.3 NMR measurements

319 Concentrations in supernatants were measured by  $^1\text{H}$  1D-NMR at 290 °K,  
320 using a 30° angle pulse and a presaturation of water signal was applied  
321 during a relaxation delay of 8 s. TSP-d4 was used as internal standard for  
322 calibration and quantification.

323 The measurement of isotopomers and specific enrichments of targeted  
324 biomass components were performed using the same samples used for  
325 proteinogenic amino acids  $^{13}\text{C}$ -isotopologues MS analysis, redried and  
326 suspended in 200  $\mu\text{l}$   $\text{D}_2\text{O}$  (0.1 % DCI). The positional isotopomer distribution  
327 of alanine C2 and C3 was extracted from the analysis of  $^{13}\text{C}$ - $^{13}\text{C}$  couplings in  
328 2D  $^1\text{H}$ - $^{13}\text{C}$  HSQC experiments (39). The carbon isotopic enrichments of  
329 alanine (C2 and C3) and histidine (C2 and C5) were extracted from the  
330 analysis of  $^1\text{H}$ - $^{13}\text{C}$  couplings using 2D-zero quantum filtered-TOCSY (ZQF-  
331 TOCSY) (40).

332 NMR spectra were collected on an Avance III 800 MHz spectrometer (Bruker,  
333 Germany), equipped with a 5mm z-gradient QPCI cryoprobe. Every  
334 acquisition 1D, 2D and absolute quantification were performed on  $^1\text{H}$ -1D  
335 spectra using TopSpin 3.5 (Bruker, Germany).

## 336 **2.4 Models and simulations**

### 337 **2.4.1 Metabolic Flux Analysis software**

338 All simulations needed for Metabolic Flux Analysis (MFA) on methanol,  
339 mannitol and arabitol were performed with *influx\_si* software v4.4.4 (41),  
340 either in stationary or non-stationary mode. *influx* has the advantage to  
341 allow for the integration of labeling data coming from different experimental  
342 setups (MS, NMR) and to support several integration strategies (stationary,  
343 non-stationary, parallel labeling).

344 All input and output files needed for reproducibility are available in an  
345 archive in Supplementary Data 2. Importantly, this includes the models in  
346 FTBL and SBML file formats.

### 347 **2.4.2 Metabolic models**

348 We designed the models to cover central carbon metabolism and biomass  
349 needs of *B. methanolicus*. *influx\_si* uses a non-standard legacy file format  
350 (FTBL) to encode the metabolic network and the associated atom-atom  
351 transitions. This format centralizes the metabolic network with all biological  
352 measurements, i.e. metabolites pool sizes, fluxes, and carbon isotopologue  
353 distribution. Consequently, we developed distinct model files for each carbon  
354 source. Models share the same nomenclature and the same general topology  
355 between them, which is displayed in Fig. 1 and detailed in Supplementary  
356 Data 1.

357 Assimilation pathways of methanol, mannitol and arabitol were included  
358 when relevant to explain the incorporation of the tracer. The CO<sub>2</sub> pool was  
359 explicitly modeled within the system to allow for re-incorporation of tracer  
360 via CO<sub>2</sub>. Amino acids synthesis pathways were modeled as part of biomass  
361 needs along with important precursors. Biomass equation was borrowed from  
362 *Bacillus subtilis* genome-scale model (42). Reaction for phosphoenolpyruvate  
363 carboxykinase (BMMGA3\_RS13120) was not included in the final model as  
364 the associated expression level was rather low in proteomics (26) and  
365 transcriptomics studies (21, 25).

366 Unless otherwise stated, each culture replicate was processed independently  
367 to estimate fluxes for their respective carbon source condition.

368 For MFA on mannitol, we exploited carbon isotopologue distribution data of  
369 proteinogenic alanine, glycine, valine, serine, threonine, phenylalanine,  
370 aspartate, glutamate, histidine, isoleucine, leucine, lysine, arginine, tyrosine,  
371 proline and methionine. Acetate production was modeled with an export flux  
372 from acetyl-CoA to which we associated the acetate flux measured from  
373 supernatant data. Acetyl-CoA was further constrained using acetate  
374 positional labeling measured by <sup>1</sup>H 1D-NMR spectroscopy from the  
375 supernatant.

376 For MFA on arabitol, we averaged the proteinogenic labeling measurements  
377 of the [5-<sup>13</sup>C] arabitol experiment and exploited it as a parallel labeling  
378 dataset for each biological replicate of the [1/2-<sup>13</sup>C] arabitol experiment. We  
379 analysed the same proteinogenic amino acids as those mentioned above for

380 mannitol. No acetate was observed in the supernatant and the associated  
381 export reaction was consequently excluded from this model. Additionally, we  
382 exploited specific labeling enrichment of histidine, alanine and ribulose-5-P,  
383 and positional isotopomer data of alanine from labeling samples as described  
384 in section 2.3.3.

385 For MFA on methanol, the non-stationary nature of the experiment and the  
386 subsequent importance of the pools on flux distributions forced us to explicit  
387 most of the reactions of the central metabolism that were lumped for the  
388 stationary models. Measurements described above were used to constrain  
389 intra and extracellular pools (section 2.2.3), and isotopologues profiles  
390 (section 2.2.4) through *influx\_si* optimization process. The exchange fluxes of  
391 CO<sub>2</sub> and methanol (feed and evaporation) were also exploited. No acetate  
392 production was observed.

### 393 **2.4.3. Quality checks**

394 Experimental data were fitted to our models as per described above. For  
395 each culture replicate we performed a Monte Carlo sensitivity analysis  
396 (n=100) on the fit to assess its robustness to small variations around the  
397 fitted values. We also performed a chi-squared goodness-of-fit statistical test  
398 to ensure that simulated data for each biological replicate were significantly  
399 close to experimental data. All tests were significant with a significance  
400 level ( $\alpha$ ) of 0.05 (Supplementary Data 2). For convenience, we provide  
401 figures of measured vs. simulated data points (Fig. S3).

402 Let us note here that we unfortunately were unable to estimate at a  
403 satisfactory precision the fluxes through malate dehydrogenase  
404 (BMMGA3\_RS12590, 1.1.1.37), malic enzyme (*mae*, BMMGA3\_RS12650,  
405 1.1.1.38 or 1.1.1.40) and pyruvate carboxylase (*pyc*, BMMGA3\_RS05255,  
406 6.4.1.1). Those three reactions formed a cycle from pyruvate (Pyr) to  
407 oxaloacetate (OAA) and malate (Mal) in all our tested models. However, the  
408 Monte Carlo sensitivity analysis revealed that those fluxes were statistically  
409 undefined (not shown), meaning that virtually any value through the cycle  
410 would satisfy the constraints of the rest of the network. In the absence of  
411 biological data to motivate any new constraint on the model, we preferred to  
412 leave those reactions out of the analysis.

## 413 **2.5 Analysis of arabitol phosphate dehydrogenases**

### 414 **AtID and AtIF**

#### 415 **2.5.1 Strains and culture conditions**

416 In this study, *Escherichia coli* DH5 $\alpha$  (43) was used as the standard cloning  
417 host and recombinant protein production was carried out with *E. coli*  
418 BL21(DE3) (44). A summary of the strains, primers and plasmids constructed  
419 and used in this study can be found in Table 1. *E. coli* strains were routinely  
420 cultivated at 37 °C and 180 rpm in Lysogeny Broth (LB) medium or on LB  
421 agar plates supplemented with 100  $\mu\text{g ml}^{-1}$  ampicillin and 0.5 mM IPTG when  
422 relevant.

## 423 **2.5.1 Recombinant DNA work**

424 Molecular cloning was performed as previously described (45) using primer  
425 sequences listed in Table 1. Total DNA isolation from *B. methanolicus* was  
426 performed as described in (46). Inserts were amplified by polymerase chain  
427 reactions (PCRs) with ALLin™ HiFi DNA Polymerase (HighQu, Kraichtal,  
428 Germany) and purified with the NucleoSpin® Gel and PCR Clean-up kit  
429 (Macherey-Nagel, Düren, Germany). Plasmids were constructed from PCR-  
430 generated fragments and pET16b vector cut with restriction enzymes using  
431 the isothermal DNA assembly method (47). The GeneJET Plasmid Miniprep Kit  
432 (Thermo Fisher Scientific, Waltham, USA) was used for plasmid isolation. For  
433 the transformation of chemically competent *E. coli* cells, the procedure  
434 described by (48) was followed. Colony PCRs were performed using Taq  
435 polymerase (New England Biolabs, Ipswich, England) with primers P192,  
436 P193, P194 and P195 (Table 1). All cloned DNA fragments were verified by  
437 sequencing (Sequencing Core Facility, Bielefeld University).

## 438 **2.3.2 Overproduction and purification of AtID and AtIF**

439 Plasmids for protein production using *E. coli* BL21 (DE3) were constructed on  
440 the basis of pET16b (Novagen, Madison, WI, USA) and are presented in  
441 Table 1. The *atID* and *atIF* genes were PCR-amplified from *B. methanolicus*  
442 MGA3 genomic DNA using the primers P192 and P193 or P194 and P195,  
443 respectively (Table 1). The resulting product was joined with *Bam*HI digested  
444 pET16b by applying the isothermal DNA assembly method (47), resulting in  
445 pET16b-*atID* and pET16b-*atIF*. The pET16 vector allows for production of N-

446 terminal His<sub>10</sub>-tagged proteins. Protein production and purification was  
447 performed following the indications of (49), except for cell lysis which was  
448 performed by sonication (UP 200 S, Dr. Hielscher GmbH, Teltow, Germany) on  
449 ice at an amplitude of 55 % and a duty cycle of 0.5 for 8 min with a pause in  
450 between. Supernatants were subsequently filtered using a 0.2 µm filter and  
451 purified by nickel affinity chromatography with nickel-activated nitrilotriacetic  
452 acid-agarose (Ni-NTA) (Novagen, San Diego, CA, USA). His-tagged AtID and  
453 AtIF proteins eluted with 20 mM Tris, 300 mM NaCl, 5 % (vol/vol) glycerol and  
454 50, 100, 200, or 400 mM imidazole were analysed by 12 % SDS-PAGE (50).  
455 Fractions showing the highest protein concentrations (with 100 and 200 mM  
456 or 100, 200 and 400 mM imidazole for AtID and AtIF, respectively) were  
457 pooled and protein concentration was measured according to the Bradford  
458 method (51) using bovine serum albumin as reference. The purified protein  
459 was subsequently applied for enzymatic assays.

### 460 **2.3.3 Arabitol phosphate dehydrogenase enzymatic assays**

461 Determination of purified AtID and AtIF activities in the reductive reaction  
462 using Xyl5P or Ribu5P as substrate were performed as previously described  
463 (23). The assay mixture contained 20 mM Tris-HCl buffer (pH 7.2), 1 mM DTT,  
464 0.04 to 0.3 mM NADH or NADPH, 0.03 to 0.6 mM Xyl5P or 0.2 to 4 mM Ribu5P  
465 and 0.01 to 0.04 mg AtID or 0.2 to 0.4 mg AtIF in a total volume of 1 ml. The  
466 oxidation rate of NADH or NADPH was monitored at 340 nm and 30 °C for 3  
467 min using a Shimadzu UV-1202 spectrophotometer (Shimadzu, Duisburg,  
468 Germany). In order to confirm the presence of arabitol phosphate in the  
469 enzyme reactions after reduction of Xyl5P and Ribu5P, samples were

470 subjected to liquid chromatography-mass spectrometry (LC-MS) analyses  
471 following the procedure described in (52).

## 472 **2.4 Data availability**

473 Gene locii mentioned throughout the text are from NCBI annotation of *B.*  
474 *methanolicus* MGA3 genome NZ\_CP007739.1  
475 ([https://www.ncbi.nlm.nih.gov/nucore/NZ\\_CP007739.1](https://www.ncbi.nlm.nih.gov/nucore/NZ_CP007739.1)).

476 Supplementary Data 1 contains growth curves, processed MS and NMR data  
477 and a summary of the reactions modeled.

478 Supplementary Data 2 contains raw models, input and output files for influx  
479 software and can be downloaded from  
480 [https://fairdomhub.org/data\\_files/3269?version=1](https://fairdomhub.org/data_files/3269?version=1).



## 481 **3. RESULTS & DISCUSSION**

### 482 **3.1 *In vitro* assessment of arabitol assimilation**

483 The operon responsible for arabitol assimilation in *B. methanolicus* consists  
484 of a PTS system (AtIABC) and two putative arabitol phosphate  
485 dehydrogenases (AtID and AtIF) (22), which are chromosomally encoded and  
486 belong to the diverse superfamily of medium-chain  
487 dehydrogenases/reductases (MDRs). However, the physiological roles of AtID  
488 and AtIF have not been described to date. Members of the MDR superfamily  
489 have high sequence conservation, but sequence-based prediction of their  
490 substrate scope is difficult since wide substrate specificity is common (53,  
491 54) (see Supplementary Text for a discussion of their phylogeny). The  
492 substrate selectivity of AtID and AtIF was therefore studied to identify  
493 whether arabitol is assimilated via arabitol 1-phosphate dehydrogenase to  
494 Xyl5P, and/or to Ribu5P via arabitol 5-phosphate dehydrogenase (23) (Fig. 2).  
495 The enzymes were purified as N-terminally His-tagged proteins from  
496 recombinant *E. coli* by nickel chelate chromatography. Arabitol phosphate  
497 oxidation could not be assayed because there are no commercial arabitol 1-  
498 phosphate or arabitol 5-phosphate standards. Therefore, the reverse reaction  
499 was tested, as described in material and methods section 2.3.3, with either  
500 Xyl5P or Ribu5P as substrate for NAD(P)H dependent reduction. A number of  
501 potential sugars (D-ribose, D-fructose, D-xylose, D-mannose, L-arabinose, D-  
502 arabinose, L-sorbose, D-galactose, D-glucose, ribose 5-phosphate, glucose 6-

503 phosphate, glucose 1-phosphate, fructose 6-phosphate and fructose 1-  
504 phosphate) and sugar alcohols (D-arabitol, D-mannitol, D-galactitol, D-sorbitol,  
505 L-arabitol, D-maltitol, D-xylitol, ribitol and meso-Erythritol) were also tested as  
506 substrates but no significant activity (i.e.  $> 0.05 \text{ U mg}^{-1}$ ) was detected. The  
507 kinetic parameters measured for AtID and AtIF reduction using either Xyl5P  
508 or Ribu5P as substrate are summarized in Table 2. The  $K_M$  of  $0.07 \pm 0.03 \text{ mM}$   
509 for AtID with Xyl5P as substrate and NADH as cofactor was 2.5 times lower  
510 than the value obtained for AtIF ( $0.18 \pm 0.05 \text{ mM}$ ). With Ribu5P as substrate,  
511 the  $K_M$  for AtID was 17 times lower ( $1.21 \pm 0.42 \text{ mM}$ ) (Table 2), and for AtIF,  
512 no activity was detected. The  $V_{\max}$  for AtID with Xyl5P as substrate and NADH  
513 as cofactor was 2.7 times higher than with Ribu5P as substrate ( $0.49 \pm$   
514  $0.06 \text{ U mg}^{-1}$ ) and 12 times higher than for AtIF with Xyl5P ( $0.11 \pm 0.01 \text{ U mg}^{-1}$ )  
515 (Table 2). NADH was the preferred cofactor over NADPH with a ten times  
516 lower  $K_M$  ( $0.01 \pm 0.01$  vs  $0.11 \pm 0.09 \text{ mM}$ ). The affinity and NADPH  
517 dependent activity ( $0.24 \pm 0.06 \text{ U mg}^{-1}$ ) could only be determined with AtID  
518 and Xyl5P, as no significant activity was detected for any of the other  
519 reactions. LC-MS analyses were performed to confirm the formation of  
520 arabitol phosphate in the enzyme reactions catalyzed by AtID. Although  
521 arabitol 1-phosphate and arabitol 5-phosphate could not be distinguished,  
522 arabitol phosphate was clearly produced with both Xyl5P and Ribu5P as  
523 substrates (Fig. S2).

524 Overall, these data suggest that AtID has a major role in arabitol catabolism  
525 *in vitro* and that AtID and AtIF both prefer Xyl5P. This suggests that arabitol is  
526 mainly assimilated through the arabitol 1-phosphate pathway. However,

527 assimilation via arabitol 5-phosphate cannot be excluded since AtID can also  
528 use Ribu5P, albeit with reduced efficiency as shown both by the kinetic  
529 parameters (Table 2) and the significant residual Ribu5P detected in the  
530 enzyme reactions (Fig. S2). Moreover, *in vitro* enzymatic analyses of purified  
531 arabitol phosphate dehydrogenase from *E. avium* (23) and *Bacillus*  
532 *halodurans* (55) showed that both could convert arabitol 1-phosphate and  
533 arabitol 5-phosphate into both Xyl5P and Ribu5P. By assessing metabolic  
534 operations *in vivo*, <sup>13</sup>C-MFA experiments should identify which assimilation  
535 pathway is actually used *in vivo*.

### 536 **3.2 <sup>13</sup>C-MFA experimental design**

537 Experimental design is a key step to define the isotopic composition of the  
538 label input and the isotopic data to be measured, thereby improving both the  
539 number of fluxes that can be estimated from a set of isotopic data and the  
540 precision of the flux values. To address this point, we used a dedicated  
541 program, IsoDesign (56), using as input metabolic models of each carbon  
542 source and several labels as described in the material and methods section.  
543 For arabitol and mannitol, good flux precision could be obtained with mass  
544 spectrometry labelling data from proteinogenic amino acids. This is  
545 advantageous for two reasons. First, the experimental setup is simpler than  
546 for intracellular metabolites because no quenching is required and the  
547 cellular pellet can just be collected by centrifugation. Second, the labelling  
548 can be measured by NMR and MS, providing crucial positional information to  
549 distinguish between the two pathways (i.e. via arabitol 5-phosphate or via

550 arabitol 1-phosphate dehydrogenase). Among the different label inputs  
551 tested, 100% [5-<sup>13</sup>C] arabitol appeared ideal to identify whether arabitol is  
552 converted into arabitol 1-phosphate only or into arabitol 5-phosphate only. In  
553 addition, a 9:1 mix of [1-<sup>13</sup>C] and [2-<sup>13</sup>C] arabitol was used to see if both  
554 pathways are active. For mannitol, the best label input was 100 % [1-<sup>13</sup>C].  
555 Finally, since methanol is a C1 compound, a stationary <sup>13</sup>C-MFA approach is  
556 not suitable since the amino acids become fully labeled in the isotopic  
557 steady-state. Non-stationary <sup>13</sup>C fluxomics should be used instead to follow  
558 the incorporation of the tracer after a pulse of labeled substrate; however  
559 significantly more <sup>13</sup>C data are required for this approach (57, 58)  
560 (Supplementary Data 1).

561 All labeling samples were collected in the exponential growth phase at  
562 metabolic steady state and analyzed by MS or 1D <sup>1</sup>H NMR. The labelling  
563 profile of the analyzed metabolites, as measured by their CIDs, were  
564 inspected manually and then used with additional NMR and physiological  
565 data to fit a model of *B. methanolicus*'s central metabolism (Supplementary  
566 Data 1).

### 567 **3.3. Measurement of physiological parameters**

568 Assessment of physiological parameters is a prerequisite for flux calculation.  
569 Here, *B. methanolicus* was grown in batch on three different carbon sources.  
570 For each cultivation, growth rate and consumption and production rates were  
571 determined. Results are given in Table 3. No significant differences between  
572 the physiological parameters obtained for the culture replicates were

573 observed. On methanol (batch cultures at 50 °C), around 35 % of the carbon  
574 source was directly evaporated, and biomass and carbon dioxide were the  
575 only products formed in detectable amounts. The maximal growth rate  
576 obtained here with methanol (0.46 h<sup>-1</sup>) is slightly higher than reported in a  
577 previous proteomic study of *B. methanolicus* MGA3 (0.40 h<sup>-1</sup>, (14)) or for the  
578 growth of the related strain *B. methanolicus* PB1 (0.32 h<sup>-1</sup>, (15)). Biomass  
579 yields did not differ significantly from 0.5 g/g indicating that approximately  
580 half of the consumed methanol went to biomass and the other half was  
581 oxidized to CO<sub>2</sub>. The growth rates with mannitol and arabitol are consistent  
582 with published values (22).

583 *B. methanolicus* MGA3 is known to overproduce glutamate at up to 50 g/l  
584 (21) on methanol under magnesium or methanol limitation (59, 60). When  
585 grown on arabitol or methanol, no metabolite accumulated in the  
586 supernatant at concentrations above the NMR detection limit (approximately  
587 100 μM). There was therefore little or no metabolite secretion by MGA3 under  
588 our chosen methanol and arabitol growth conditions, which is consistent with  
589 previous studies and the growth conditions studied here (27, 28). However,  
590 acetate was produced at up to 2 mmol/gDCW/h in mannitol cultures (yield,  
591 0.3 mol/mol). To the best of our knowledge, acetate production has never  
592 previously been reported for *B. methanolicus*. Based on genomics data (21),  
593 we hypothesized that acetate is synthesized from acetyl-CoA in a classical  
594 two-step process involving phosphate acetyltransferase (EC:2.3.1.8,  
595 BMMGA3\_RS15725) and acetate kinase (EC:2.7.2.1, BMMGA3\_RS12735).  
596 Acetate has moreover been discussed at length in the context of overflow

597 metabolism, a special metabolic state in which fermentation pathways are  
598 used even though further oxidation (respiration) would be more ATP-efficient  
599 (61–64). Overflow metabolism has industrial implications since it could lead  
600 to carbon and energy waste.

601 Overall, we showed the reproducible growth characteristics of our cultures,  
602 and showed an unexpected production of acetate that may have an impact  
603 for industrial applications, as overflow metabolism leads to carbon and  
604 energy waste.

### 605 **3.4 *In vivo* characterization of arabitol assimilation**

606 The *in vitro* enzymatic analyses of the two dehydrogenases, AtID and AtIF,  
607 suggest that both assimilation pathways (i.e. via arabitol 1-phosphate and  
608 via arabitol 5-phosphate) may operate *in vivo*. To confirm whether either or  
609 both arabitol assimilation pathways are operative in *B. methanolicus*, as  
610 suggested for *E. avium* (23) and *Bacillus halodurans* (55), we carried out a  
611 <sup>13</sup>C-MFA specifically designed to discriminate between the two pathways (see  
612 section 3.1, and Fig 2). Interestingly, while the possibility to assimilate  
613 arabitol through Xyl5P or Ribu5P or both was a free parameter, the optimal  
614 solution found during the fitting process exclusively used the route through  
615 Xyl5P (Fig. 1C). This indicates that the (low) activity observed *in vitro* through  
616 Ribu5P was not present at a detectable level in our cultures, and that the PTS  
617 system imports arabitol as arabitol 1-phosphate. The kinetic parameters  
618 obtained for AtID and AtIF are in line with the flux data, i.e. entry of arabitol  
619 into the pentose phosphate pathway (PPP) via PTS-mediated uptake and

620 phosphorylation to arabitol 1-phosphate followed by oxidation to Xyl5P with  
621 AtID as the major dehydrogenase (Fig. 2 and Table 2).

622 Overall, these data demonstrate for the first time how arabitol is assimilated  
623 in *B. methanolicus* and rule out the hypothesis of additional catabolism  
624 through arabitol 5-phosphate and Ribu5P derived from our enzymatic  
625 analyses (Table 2) and previous reports in *E. avium* (23) and *B. halodurans*  
626 (55).

### 627 **3.5. *In vivo* operation of the pentose phosphate** 628 **pathway with the different carbon sources**

629 *B. methanolicus* assimilates methanol through the ribulose monophosphate  
630 (RuMP) cycle that condenses formaldehyde (For) and ribulose 5-P (Ribu5P)  
631 into hexulose 6-P (Hex6P) (65). The regenerative part of the RuMP cycle that  
632 maintains a pool of Ribu5P overlaps with the non-oxidative pentose  
633 phosphate pathway (PPP). Strong flux through the PPP is therefore expected  
634 on methanol and indeed, ribulose-phosphate 3-epimerase's relative flux  
635 accounted for 67 % of methanol assimilation (*rpe*, Fig. 1A). Interestingly,  
636 mannitol and arabitol are closely connected to the PPP since mannitol is  
637 converted to fructose 6-P (F6P) (just like methanol), whereas arabitol is  
638 converted to Xyl5P as discussed above. On mannitol (Fig. 1B), PPP utilization  
639 was low (the estimated *rpe* flux was 15 % of mannitol assimilation), which  
640 contrasts with the predominance of the PPP on methanol. On arabitol  
641 (Fig. 1C), the fluxes associated with the PPP remained low (*rpe* flux,  
642 1.2 mmol/gDCW/h; Fig. 3), but they accounted for a larger fraction of the

643 assimilated carbon flow (the estimated *rpe* flux was 28 % of arabitol  
644 assimilation) than on mannitol. This indicates that the PPP is more important  
645 for carbon assimilation on arabitol than on mannitol, in spite of similar  
646 absolute reaction rates and expression levels (22). Simulations carried  
647 without transaldolase activity indicated that it was essential to explain the  
648 labeling data given the network topology used (notably *glpx* been  
649 irreversible). A possibility for future studies would be to take advantage of  
650 adaptive laboratory driven evolution, or overexpression of key enzymes such  
651 as transaldolase, to investigate if the PPP could be adjusted to increase  
652 growth rates when arabitol is the sole source of carbon and energy.

653 The RuMP cycle has several variants, which differ in their efficiency (66).  
654 Genes for two of these have been identified in MGA3, namely, the fructose  
655 bisphosphate aldolase/sedoheptulose bisphosphatase (SBPase) cycle (67)  
656 and the fructose bisphosphate aldolase/transaldolase (TA) cycle, which as  
657 their names suggest favor the regeneration of Rib5P through sedoheptulose  
658 bisphosphatase and transaldolase, respectively. It is generally accepted that  
659 MGA3 uses the SBPase variant (65). The main evidence for this is the  
660 presence of a copy of a characteristic gene of the SBPase variant (*glpX<sup>P</sup>*) on  
661 the pBM19 plasmid, whereas there is only one transaldolase gene (*ta<sup>C</sup>*) in the  
662 chromosome. Proteomic (26) and transcriptomic (21) studies have also  
663 associated *glpX<sup>P</sup>* with a significant increase in expression in methanol  
664 compared with mannitol, whereas the expression associated with *ta<sup>C</sup>*  
665 remained constant. According to the MFA, both *glpx* (associated to *glpX<sup>P</sup>*) and  
666 *ta* (associated to *ta<sup>C</sup>*) carry a comparable flux, thus both variant may be



667 active (Fig. 3). This arrangement may serve as a fail-safe to guarantee the  
668 replenishment of Ribu5P. Alternatively, since transaldolase activity is  
669 essential to fit the isotopic data for growth on arabitol, an advantage of the  
670 TA cycle may be that it increases the flexibility of the PPP and allows the  
671 regeneration of important precursors such as Ribu5P from different carbon  
672 sources.

673 The labeling data suggest that the oxidative part of the PPP is almost shut  
674 down on methanol, with an estimated absolute flux of 0.16 mmol/gDCW/h  
675 through glucose 6-phosphate isomerase (*pgi*, < 1 % of the flux relative to  
676 methanol assimilation, Fig. 3). On mannitol and on arabitol, utilization of the  
677 oxidative part of the PPP is higher, with estimated absolute fluxes of 1.87  
678 mmol/gDCW/h and 0.53 mmol/gDCW/h, respectively (Fig. 3). This is in  
679 contrast with previous findings that suggested that the oxidative part of the  
680 PPP might be used on methanol to provide NADPH while detoxifying  
681 formaldehyde (14, 27) via the so-called cyclic dissimilatory RuMP pathway  
682 (21, 68). This claim is supported by (27), based on the comparable pool sizes  
683 and isotopic labeling incorporation rates between metabolites of the PPP and  
684 6-phosphogluconate (Gnt6P), a key metabolite of the oxidative part of the  
685 PPP. Additionally, glucose 6-phosphate dehydrogenase (*zwf*,  
686 BMMGA3\_RS06660) has been found to be highly over-expressed in both  
687 transcriptomics and proteomics studies on methanol compared to mannitol  
688 (14). Nonetheless, the same studies report that the other steps of the  
689 oxidative PPP are not over-expressed, which include the decarboxylation  
690 conducted by phosphogluconate dehydrogenase (*gnd*, BMMGA3\_RS10800).

691 The utilization of the oxidative part of the PPP is of particular interest  
692 because, intuitively, one imagines that decarboxylation should be avoided  
693 when growth occurs on a C1 to avoid wasting carbon. This intuition proved to  
694 be correct in Bennett et al.'s (69) study of an *E. coli* synthetic methylotroph  
695 in which they knocked-out *pgi* to increase the regeneration of Rib5P through  
696 the non-oxidative part of the PPP. However, we cannot exclude the possibility  
697 that the oxidative part of the PPP serves as a backup formaldehyde  
698 dissimilation pathway when the linear dissimilation pathways become  
699 saturated at high methanol concentrations. *B. methanolicus* is indeed quite  
700 sensitive to variations in methanol concentration (70) and we can assume  
701 that this critical biological function is tightly controlled. The true importance  
702 of the cyclic dissimilatory RuMP pathway for natural methylotrophic growth is  
703 therefore difficult to ascertain without additional experiments to specifically  
704 measure utilization of the oxidative part of the PPP at different methanol  
705 concentrations.

706 As expected, the <sup>13</sup>C-MFA shows that the PPP is critical on methanol as it  
707 overlaps with the RuMP responsible for methanol assimilation. The SBPase  
708 variant of the RuMP is active, however we could not rule out a parallel  
709 operation of the TA variant. We suggest that a parallel operation on mixed  
710 carbon sources may benefit *B. methanolicus* to replenish important  
711 precursors pools. Surprisingly, the oxidative part of the PPP was inactive in  
712 our conditions, which question the true importance of the cyclic dissimilatory  
713 RuMP for methylotrophic growth.

### 714 **3.6 *In vivo* operation of the TCA cycle with the** 715 **different carbon sources**

716 *B. methanolicus* has a full gene set for a functional tricarboxylic acid cycle  
717 (TCA) and glyoxylate shunt (14, 21). This seems to contrast with some  
718 methylotrophs, including some that use the RuMP pathway, that do not need  
719 a complete TCA to fulfill their energy requirements (71). Results (Fig. 1A)  
720 indicate that the TCA is used much less than the RuMP pathway on methanol,  
721 with a rate close to 1 mmol/gDCW/h up to 2-oxoglutarate (AKG) and no flux  
722 afterwards (Fig. 3). This small flux is needed to support the synthesis of  
723 biomass precursors. On mannitol and arabitol in contrast, the TCA is used  
724 intensively, with rates of 3.5 and 4.7 mmol/gDCW/h respectively for isocitrate  
725 dehydrogenase (*idh*). These results are in agreement with previous  
726 measurements of the actual usage of the TCA during methylotrophic growth.  
727 At the transcript and protein levels, it has been suggested that the TCA  
728 should be more active on mannitol than on methanol (21, 26). Activity  
729 assays in crude cell extracts also showed very low 2-oxoglutarate  
730 dehydrogenase (*akgdh*) activity (59). Finally, isotopic labeling experiments  
731 have shown slow isotopic enrichment of key TCA metabolites (citrate, 2-  
732 oxoglutarate, fumarate) on methanol (27).

733 Although *B. methanolicus* also has glyoxylate shunt genes  
734 (BMMGA3\_RS01750, 2.3.3.9; and BMMGA3\_RS01755, 4.1.3.1), the reported  
735 expression levels suggest that this pathway does not carry a high flux under  
736 mannitol or under methanol growth conditions (21, 26). In agreement with

737 these findings, the glyoxylate shunt fluxes estimated in this study were  
738 negligible under all the tested conditions (Fig. 3).  
739 Overall, as reported before, the TCA is mainly active in non-methylotrophic  
740 conditions and the glyoxylate shunt was inactive in our conditions.

### 741 **3.7 Analysis of cofactor usage with the various** 742 **carbon sources**

743 To assess how *B. methanolicus* balances its redox and energy needs, we used  
744 the estimated fluxes from the <sup>13</sup>C-MFA to infer production and consumption  
745 rates of ATP, NADH and NADPH, as displayed in Fig. 4. <sup>13</sup>C-MFA is constrained  
746 by carbon balance and the distribution of the isotopic tracer, but unlike flux  
747 balance analysis it is typically not constrained by cofactor balance. We used  
748 the estimated fluxes from the MFA and the expected stoichiometry of the  
749 associated reactions to assess the absolute rates of cofactor production and  
750 consumption. In the absence of specific measurements, we use the biomass  
751 requirements of *B. subtilis* (7, 72). Additionally, since the samples were  
752 collected in metabolic pseudo steady-state, the production and consumption  
753 rates of each cofactor were assumed to be balanced; this allowed us to  
754 identify rates that would have been impossible to estimate otherwise such as  
755 the proportion of NAD (and ATP) formed from the respiratory chain (with a  
756 P/O=1.5) and other production/consumption rates not accounted for by our  
757 other assumptions.

758 Despite their different growth rates, which influence their cofactor  
759 requirements for growth (Table 3), the cells grown on mannitol and arabitol

760 had a similar absolute usage of NADH, NADPH and ATP (Fig. 4). ATP and  
761 NADH came mostly from the same sources. However, the proportion of  
762 NADPH generated in the oxidative part of the PPP was three times higher in  
763 mannitol growth conditions than in arabitol (3.5 against 1.0 mmol/gDCW/h).  
764 This difference was compensated by a higher flux in the TCA for arabitol (4.7  
765 against 3.5 mmol/gDCW/h) in excess of the estimated NADPH requirements  
766 for growth and even contributing to the production of  $\sim 3.4$  mmol/gDCW/h  
767 NADPH whose consumption remains unaccounted for. Discrepancies between  
768 estimates of the cofactor requirements for biomass formation and those  
769 derived from measured isotopic data are typical for this kind of analysis (73,  
770 74), and can be attributed to an underestimation of cofactor requirements,  
771 notably for non-essential processes such as cell motility (for ATP). Note,  
772 nevertheless, that the estimated biomass requirement for NADPH was not  
773 covered under methanol conditions, as 1.5 mmol/gDCW/h is missing from the  
774 balance. This may be due to an unaccounted for NADPH-producing process  
775 (75), for instance the malic enzyme (*mae*, 1.1.1.40, BMMGA3\_RS12650)  
776 whose flux could not be estimated with this approach. To the best of our  
777 knowledge, there is no evidence of transhydrogenase activity in *B.*  
778 *methanolicus*.

779 Comparing methylotrophic and non-methylotrophic growth, it is perhaps  
780 unsurprising that NADH is produced at a higher rate on methanol  
781 (44 mmol/gDCW/h, versus 30 mmol/gDCW/h on mannitol), because of the  
782 conversion of methanol into formaldehyde by methanol dehydrogenase (76).  
783 This suggests that at the same growth rate, O<sub>2</sub> consumption should be higher

784 on methanol to provide the additional NAD<sup>+</sup> required. Unlike NADH, the  
785 NADPH total production is estimated to be roughly the same across our  
786 conditions, around 6 mmol/gDCW/h (Fig. 4). As discussed above, the linear  
787 formaldehyde detoxification pathways are extensively used in our methanol  
788 conditions, while usage of the oxidative part of the PPP (which would be part  
789 of the cyclic dissemination pathway) is negligible. In term of cofactors, this  
790 mostly affects the sources used for NADPH formation, as the major source on  
791 methanol is the detoxification pathway (4.8 mmol/gDCW/h), while the main  
792 sources on mannitol are the oxidative part of the PPP (3.6 mmol/gDCW/h)  
793 and the TCA (3.5 mmol/gDCW/h). These estimates suggest that linear  
794 detoxification pathways play an important role in the generation of NADPH  
795 on methanol, in addition to their established protective function against  
796 formaldehyde.

797 Non-methylotrophic growth on mannitol and arabitol share the same features  
798 despite their associated different growth rates (with the notable exception of  
799 the contribution of the oxidative PPP for NADPH production). On methanol,  
800 however, we observe more differences in the origin of cofactors production  
801 which clearly highlight a different metabolic state. Importantly, the linear  
802 detoxification pathways could have a more important role in cofactor  
803 regeneration than what was previously envisioned.

### 804 **3.8. Conclusion**

805 In summary, this MFA of *B. methanolicus* MGA3 provides three snapshots of  
806 its metabolic states for growth on methanol, mannitol or arabitol. Isotopic

807 data are consistent with prior knowledge of MGA3 methylotrophy, showing  
808 greater flux in the RuMP cycle than in the TCA. The <sup>13</sup>C-MFA provided new  
809 insights related to the utilization of cyclic RuMP versus linear dissimilation  
810 pathways, and between the RuMP cycle variants; and finally, the  
811 characterization of the arabitol assimilation pathway was completed using  
812 enzymatic data. In futur studies, these validated flux maps will be used as  
813 references for constraint based modelling to validate genome-scale model  
814 predictions. Overall, the information provided in this work and previous omics  
815 studies on *B. methanolicus* metabolism can be used to improve design  
816 strategies for new strains (i.e. by multi-omics analysis). The experimental  
817 path outlined here likely leads to *B. methanolicus* becoming a viable  
818 alternative to existing cell factories.

## 819 **References**

- 820 1. Peyraud R, Kiefer P, Christen P, Massou S, Portais J-C, Vorholt JA. 2009.  
821 Demonstration of the ethylmalonyl-CoA pathway by using <sup>13</sup>C  
822 metabolomics. PNAS 106:4846–4851.
- 823 2. Fendt S-M, Oliveira AP, Christen S, Picotti P, Dechant RC, Sauer U. 2010.  
824 Unraveling condition-dependent networks of transcription factors that  
825 control metabolic pathway activity in yeast. Molecular Systems Biology  
826 6:432.
- 827 3. Becker J, Zelder O, Häfner S, Schröder H, Wittmann C. 2011. From zero to  
828 hero—Design-based systems metabolic engineering of *Corynebacterium*  
829 *glutamicum* for l-lysine production. Metabolic Engineering 13:159–168.
- 830 4. Heux S, Poinot J, Massou S, Sokol S, Portais J-C. 2014. A novel platform  
831 for automated high-throughput fluxome profiling of metabolic variants.  
832 Metab Eng 25:8–19.
- 833 5. Klingner A, Bartsch A, Dogs M, Wagner-Döbler I, Jahn D, Simon M,  
834 Brinkhoff T, Becker J, Wittmann C. 2015. Large-Scale <sup>13</sup>C flux profiling  
835 reveals conservation of the Entner-Doudoroff pathway as a glycolytic  
836 strategy among marine bacteria that use glucose. Appl Environ Microbiol  
837 81:2408–2422.
- 838 6. Van Dien SJ, Strovas T, Lidstrom ME. 2003. Quantification of central  
839 metabolic fluxes in the facultative methylotroph *Methylobacterium*  
840 *extorquens* AM1 using <sup>13</sup>C-label tracing and mass spectrometry.  
841 Biotechnol Bioeng 84:45–55.
- 842 7. Peyraud R, Schneider K, Kiefer P, Massou S, Vorholt JA, Portais J-C. 2011.  
843 Genome-scale reconstruction and system level investigation of the



- 844 metabolic network of *Methylobacterium extorquens* AM1. *BMC Systems*  
845 *Biology* 5:189.
- 846 8. Fu Y, He L, Reeve J, Beck DAC, Lidstrom ME. 2019. Core Metabolism  
847 Shifts during Growth on Methanol versus Methane in the Methanotroph  
848 *Methylomicrobium buryatense* 5GB1. *MBio* 10.
- 849 9. Niedenführ S, Wiechert W, Nöh K. 2015. How to measure metabolic  
850 fluxes: a taxonomic guide for <sup>13</sup>C fluxomics. *Current Opinion in*  
851 *Biotechnology* 34:82–90.
- 852 10. Heux S, Bergès C, Millard P, Portais J-C, Létisse F. 2017. Recent advances  
853 in high-throughput <sup>13</sup>C-fluxomics. *Current Opinion in Biotechnology*  
854 43:104–109.
- 855 11. Schendel FJ, Bremmon CE, Flickinger MC, Guettler M, Hanson RS. 1990.  
856 L-lysine production at 50 degrees C by mutants of a newly isolated and  
857 characterized methylotrophic *Bacillus* sp. *Appl Environ Microbiol* 56:963–  
858 970.
- 859 12. Pfeifenschneider J, Brautaset T, Wendisch VF. 2017. Methanol as carbon  
860 substrate in the bio-economy: Metabolic engineering of aerobic  
861 methylotrophic bacteria for production of value-added chemicals:  
862 Methanol as carbon substrate in the bio-economy. *Biofuels, Bioproducts*  
863 *and Biorefining* 11:719–731.
- 864 13. Iaquaniello G, Centi G, Salladini A, Palo E, Perathoner S. 2018. Waste to  
865 Chemicals for a Circular Economy. *Chemistry* 24:11831–11839.
- 866 14. Müller JEN, Heggeset TMB, Wendisch VF, Vorholt JA, Brautaset T. 2015.  
867 Methylotrophy in the thermophilic *Bacillus methanolicus*, basic insights  
868 and application for commodity production from methanol. *Applied*  
869 *Microbiology and Biotechnology* 99:535–551.

- 870 15. Komives CF, Cheung LY-Y, Pluschkell SB, Flickinger MC. 2005. Growth of  
871 *Bacillus methanolicus* in seawater-based media. *J Ind Microbiol*  
872 *Biotechnol* 32:61–66.
- 873 16. Naerdal I, Pfeifenschneider J, Brautaset T, Wendisch VF. 2015. Methanol-  
874 based cadaverine production by genetically engineered *B acillus*  
875 *methanolicus* strains: Cadaverine production by *Bacillus methanolicus*.  
876 *Microbial Biotechnology* 8:342–350.
- 877 17. Irla M, Nærdal I, Brautaset T, Wendisch VF. 2017. Methanol-based  $\gamma$ -  
878 aminobutyric acid (GABA) production by genetically engineered *Bacillus*  
879 *methanolicus* strains. *Industrial Crops and Products* 106:12–20.
- 880 18. Drejer EB, Hakvåg S, Irla M, Brautaset T. 2018. Genetic Tools and  
881 Techniques for Recombinant Expression in Thermophilic Bacillaceae.  
882 *Microorganisms* 6.
- 883 19. Irla M, Heggeset TMB, Nærdal I, Paul L, Haugen T, Le SB, Brautaset T,  
884 Wendisch VF. 2016. Genome-Based Genetic Tool Development for  
885 *Bacillus methanolicus*: Theta- and Rolling Circle-Replicating Plasmids for  
886 Inducible Gene Expression and Application to Methanol-Based  
887 Cadaverine Production. *Frontiers in Microbiology* 07.
- 888 20. Schultenkämper K, Brito LF, López MG, Brautaset T, Wendisch VF. 2019.  
889 Establishment and application of CRISPR interference to affect  
890 sporulation, hydrogen peroxide detoxification, and mannitol catabolism  
891 in the methylotrophic thermophile *Bacillus methanolicus*. *Appl Microbiol*  
892 *Biotechnol* 103:5879–5889.
- 893 21. Heggeset TMB, Krog A, Balzer S, Wentzel A, Ellingsen TE, Brautaset T.  
894 2012. Genome Sequence of Thermotolerant *Bacillus methanolicus*:  
895 Features and Regulation Related to Methylotrophy and Production of l-

- 896 Lysine and l-Glutamate from Methanol. *Appl Environ Microbiol* 78:5170-  
897 5181.
- 898 22. López MG, Irla M, Brito LF, Wendisch VF. 2019. Characterization of D-  
899 Arabitol as Newly Discovered Carbon Source of *Bacillus methanolicus*.  
900 *Front Microbiol* 10:1725.
- 901 23. Povelainen M, Eneyskaya EV, Kulminskaya AA, Ivanen DR, Kalkkinen N,  
902 Neustroev KN, Miasnikov AN. 2003. Biochemical and genetic  
903 characterization of a novel enzyme of pentitol metabolism: D-arabitol-  
904 phosphate dehydrogenase. *Biochem J* 371:191-197.
- 905 24. Irla M, Neshat A, Winkler A, Albersmeier A, Heggeset TMB, Brautaset T,  
906 Kalinowski J, Wendisch VF, Rückert C. 2014. Complete genome sequence  
907 of *Bacillus methanolicus* MGA3, a thermotolerant amino acid producing  
908 methylotroph. *J Biotechnol* 188:110-111.
- 909 25. Irla M, Neshat A, Brautaset T, Rückert C, Kalinowski J, Wendisch VF. 2015.  
910 Transcriptome analysis of thermophilic methylotrophic *Bacillus*  
911 *methanolicus* MGA3 using RNA-sequencing provides detailed insights  
912 into its previously uncharted transcriptional landscape. *BMC Genomics*  
913 16:73.
- 914 26. Müller JEN, Litsanov B, Bortfeld-Miller M, Trachsel C, Grossmann J,  
915 Brautaset T, Vorholt JA. 2014. Proteomic analysis of the thermophilic  
916 methylotroph *Bacillus methanolicus* MGA3. *Proteomics* 14:725-737.
- 917 27. Müller JEN, Meyer F, Litsanov B, Kiefer P, Vorholt JA. 2015. Core pathways  
918 operating during methylotrophy of *Bacillus methanolicus* MGA3 and  
919 induction of a bacillithiol-dependent detoxification pathway upon  
920 formaldehyde stress. *Mol Microbiol* 98:1089-1100.

- 921 28. Carnicer M, Vieira G, Brautaset T, Portais J-C, Heux S. 2016. Quantitative  
922 metabolomics of the thermophilic methylotroph *Bacillus methanolicus*.  
923 *Microbial Cell Factories* 15.
- 924 29. Izhaki I, Fridman S, Gerchman Y, Halpern M. 2013. Variability of bacterial  
925 community composition on leaves between and within plant species.  
926 *Curr Microbiol* 66:227-235.
- 927 30. Fall R, Benson AA. 1996. Leaf methanol — the simplest natural product  
928 from plants. *Trends in Plant Science* 1:296-301.
- 929 31. Mashego MR, Wu L, Van Dam JC, Ras C, Vinke JL, Van Winden WA, Van  
930 Gulik WM, Heijnen JJ. 2004. MIRACLE: mass isotopomer ratio analysis of  
931 U-13C-labeled extracts. A new method for accurate quantification of  
932 changes in concentrations of intracellular metabolites. *Biotechnol Bioeng*  
933 85:620-628.
- 934 32. Kiefer P, Nicolas C, Letisse F, Portais J-C. 2007. Determination of carbon  
935 labeling distribution of intracellular metabolites from single fragment  
936 ions by ion chromatography tandem mass spectrometry. *Anal Biochem*  
937 360:182-188.
- 938 33. Millard P, Delépine B, Guionnet M, Heuillet M, Bellvert F, Létisse F. IsoCor:  
939 isotope correction for high-resolution MS labeling experiments.  
940 *Bioinformatics*.
- 941 34. van der Heijden RT, Romein B, Heijnen JJ, Hellinga C, Luyben KC. 1994.  
942 Linear constrain relations in biochemical reaction systems III. Sequential  
943 application of data reconciliation for sensitive detection of systematic  
944 errors. *Biotechnol Bioeng* 44:781-791.
- 945 35. Dauner M, Sauer U. 2001. Stoichiometric growth model for riboflavin-  
946 producing *Bacillus subtilis*. *Biotechnol Bioeng* 76:132-143.

- 947 36. Dauner M, Bailey JE, Sauer U. 2001. Metabolic flux analysis with a  
948 comprehensive isotopomer model in *Bacillus subtilis*. *Biotechnol Bioeng*  
949 76:144–156.
- 950 37. Stephanopoulos G, Locher G, Duff MJ, Kamimura R, Stephanopoulos G.  
951 1997. Fermentation database mining by pattern recognition. *Biotechnol*  
952 *Bioeng* 53:443–452.
- 953 38. Boudah S, Olivier M-F, Aros-Calt S, Oliveira L, Fenaille F, Tabet J-C, Junot  
954 C. 2014. Annotation of the human serum metabolome by coupling three  
955 liquid chromatography methods to high-resolution mass spectrometry. *J*  
956 *Chromatogr B Analyt Technol Biomed Life Sci* 966:34–47.
- 957 39. Massou S, Nicolas C, Letisse F, Portais J-C. 2007. NMR-based fluxomics:  
958 quantitative 2D NMR methods for isotopomers analysis. *Phytochemistry*  
959 68:2330–2340.
- 960 40. Massou S, Nicolas C, Letisse F, Portais J-C. 2007. Application of 2D-TOCSY  
961 NMR to the measurement of specific(<sup>13</sup>C-enrichments in complex  
962 mixtures of <sup>13</sup>C-labeled metabolites. *Metab Eng* 9:252–257.
- 963 41. Sokol S, Millard P, Portais J-C. 2012. *influx\_s*: increasing numerical  
964 stability and precision for metabolic flux analysis in isotope labelling  
965 experiments. *Bioinformatics* 28:687–693.
- 966 42. Sauer U, Hatzimanikatis V, Hohmann HP, Manneberg M, van Loon AP,  
967 Bailey JE. 1996. Physiology and metabolic fluxes of wild-type and  
968 riboflavin-producing *Bacillus subtilis*. *Appl Environ Microbiol* 62:3687–  
969 3696.
- 970 43. Hanahan D. 1983. Studies on transformation of *Escherichia coli* with  
971 plasmids. *J Mol Biol* 166:557–580.

- 972 44. Studier FW, Moffatt BA. 1986. Use of bacteriophage T7 RNA polymerase  
973 to direct selective high-level expression of cloned genes. *J Mol Biol*  
974 189:113-130.
- 975 45. Green MR, Sambrook J, Sambrook J. 2012. *Molecular cloning: a laboratory*  
976 *manual* 4th ed. Cold Spring Harbor Laboratory Press, Cold Spring Harbor,  
977 N.Y.
- 978 46. Eikmanns BJ, Thum-Schmitz N, Eggeling L, Lüdtko KU, Sahm H. 1994.  
979 Nucleotide sequence, expression and transcriptional analysis of the  
980 *Corynebacterium glutamicum* *gltA* gene encoding citrate synthase.  
981 *Microbiology (Reading, Engl)* 140 ( Pt 8):1817-1828.
- 982 47. Gibson DG, Young L, Chuang R-Y, Venter JC, Hutchison CA, Smith HO.  
983 2009. Enzymatic assembly of DNA molecules up to several hundred  
984 kilobases. *Nat Methods* 6:343-345.
- 985 48. Mandel M, Higa A. 1970. Calcium-dependent bacteriophage DNA  
986 infection. *J Mol Biol* 53:159-162.
- 987 49. Lindner SN, Vidaurre D, Willbold S, Schoberth SM, Wendisch VF. 2007.  
988 NCgl2620 encodes a class II polyphosphate kinase in *Corynebacterium*  
989 *glutamicum*. *Appl Environ Microbiol* 73:5026-5033.
- 990 50. Laemmli UK. 1970. Cleavage of structural proteins during the assembly  
991 of the head of bacteriophage T4. *Nature* 227:680-685.
- 992 51. Bradford MM. 1976. A rapid and sensitive method for the quantitation of  
993 microgram quantities of protein utilizing the principle of protein-dye  
994 binding. *Analytical Biochemistry* 72:248-254.
- 995 52. Stolzenberger J, Lindner SN, Persicke M, Brautaset T, Wendisch VF. 2013.  
996 Characterization of fructose 1,6-bisphosphatase and sedoheptulose 1,7-  
997 bisphosphatase from the facultative ribulose monophosphate cycle  
998 methylotroph *Bacillus methanolicus*. *J Bacteriol* 195:5112-5122.

- 999 53. Nordling E, Jörnvall H, Persson B. 2002. Medium-chain  
1000 dehydrogenases/reductases (MDR). Family characterizations including  
1001 genome comparisons and active site modeling. *Eur J Biochem* 269:4267–  
1002 4276.
- 1003 54. Persson B, Hedlund J, Jörnvall H. 2008. Medium- and short-chain  
1004 dehydrogenase/reductase gene and protein families: the MDR  
1005 superfamily. *Cell Mol Life Sci* 65:3879–3894.
- 1006 55. Soroka NV, Kulminskaya AA, Eneyskaya EV, Shabalin KA, Uffimtcev AV,  
1007 Povelainen M, Miasnikov AN, Neustroev KN. 2005. Synthesis of arabinitol  
1008 1-phosphate and its use for characterization of arabinitol-phosphate  
1009 dehydrogenase. *Carbohydr Res* 340:539–546.
- 1010 56. Millard P, Sokol S, Letisse F, Portais J-C. 2014. IsoDesign: a software for  
1011 optimizing the design of <sup>13</sup>C-metabolic flux analysis experiments.  
1012 *Biotechnol Bioeng* 111:202–208.
- 1013 57. Wiechert W, Nöh K. 2005. From Stationary to Instationary Metabolic Flux  
1014 Analysis, p. 145–172. *In* Kragl, U (ed.), *Technology Transfer in*  
1015 *Biotechnology*. Springer Berlin Heidelberg, Berlin, Heidelberg.
- 1016 58. Nöh K, Grönke K, Luo B, Takors R, Oldiges M, Wiechert W. 2007. Metabolic  
1017 flux analysis at ultra short time scale: isotopically non-stationary <sup>13</sup>C  
1018 labeling experiments. *J Biotechnol* 129:249–267.
- 1019 59. Brautaset T, Williams MD, Dillingham RD, Kaufmann C, Bennaars A,  
1020 Crabbe E, Flickinger MC. 2003. Role of the *Bacillus methanolicus* citrate  
1021 synthase II gene, *citY*, in regulating the secretion of glutamate in L-  
1022 lysine-secreting mutants. *Appl Environ Microbiol* 69:3986–3995.
- 1023 60. Shiio I, Sano K, Nakamori S. December 1972. Method of producing L-  
1024 lysine by fermentation. US3707441A.

- 1025 61. Szenk M, Dill KA, de Graff AMR. 2017. Why Do Fast-Growing Bacteria  
1026 Enter Overflow Metabolism? Testing the Membrane Real Estate  
1027 Hypothesis. *Cell Syst* 5:95–104.
- 1028 62. Bernal V, Castaño-Cerezo S, Cánovas M. 2016. Acetate metabolism  
1029 regulation in *Escherichia coli*: carbon overflow, pathogenicity, and  
1030 beyond. *Appl Microbiol Biotechnol* 100:8985–9001.
- 1031 63. Enjalbert B, Millard P, Dinclaux M, Portais J-C, Létisse F. 2017. Acetate  
1032 fluxes in *Escherichia coli* are determined by the thermodynamic control  
1033 of the Pta-AckA pathway. *Sci Rep* 7:42135.
- 1034 64. Polen T, Rittmann D, Wendisch VF, Sahm H. 2003. DNA microarray  
1035 analyses of the long-term adaptive response of *Escherichia coli* to  
1036 acetate and propionate. *Appl Environ Microbiol* 69:1759–1774.
- 1037 65. Jakobsen ØM, Benichou A, Flickinger MC, Valla S, Ellingsen TE, Brautaset  
1038 T. 2006. Upregulated transcription of plasmid and chromosomal ribulose  
1039 monophosphate pathway genes is critical for methanol assimilation rate  
1040 and methanol tolerance in the methylotrophic bacterium *Bacillus*  
1041 *methanolicus*. *J Bacteriol* 188:3063–3072.
- 1042 66. Anthony C. 1991. Assimilation of carbon by methylotrophs.  
1043 *Biotechnology* 18:79–109.
- 1044 67. Stolzenberger J, Lindner SN, Wendisch VF. 2013. The methylotrophic  
1045 *Bacillus methanolicus* MGA3 possesses two distinct fructose 1,6-  
1046 bisphosphate aldolases. *Microbiology (Reading, Engl)* 159:1770–1781.
- 1047 68. Chistoserdova LV, Chistoserdov AY, Schklyar NL, Baev MV, Tsygankov YD.  
1048 1991. Oxidative and assimilative enzyme activities in continuous  
1049 cultures of the obligate methylotroph *Methylobacillus flagellatum*.  
1050 *Antonie Van Leeuwenhoek* 60:101–107.



- 1051 69. Bennett RK, Gonzalez JE, Whitaker WB, Antoniewicz MR, Papoutsakis ET.  
1052 2018. Expression of heterologous non-oxidative pentose phosphate  
1053 pathway from *Bacillus methanolicus* and phosphoglucose isomerase  
1054 deletion improves methanol assimilation and metabolite production by a  
1055 synthetic *Escherichia coli* methylotroph. *Metabolic Engineering* 45:75–85.
- 1056 70. Bozdogan A, Komives C, Flickinger MC. 2015. Growth of *Bacillus*  
1057 *methanolicus* in 2 M methanol at 50 °C: the effect of high methanol  
1058 concentration on gene regulation of enzymes involved in formaldehyde  
1059 detoxification by the ribulose monophosphate pathway. *J Ind Microbiol*  
1060 *Biotechnol* 42:1027–1038.
- 1061 71. Chistoserdova L, Kalyuzhnaya MG, Lidstrom ME. 2009. The expanding  
1062 world of methylotrophic metabolism. *Annu Rev Microbiol* 63:477–499.
- 1063 72. Oh Y-K, Palsson BO, Park SM, Schilling CH, Mahadevan R. 2007. Genome-  
1064 scale reconstruction of metabolic network in *Bacillus subtilis* based on  
1065 high-throughput phenotyping and gene essentiality data. *J Biol Chem*  
1066 282:28791–28799.
- 1067 73. Gonzalez JE, Long CP, Antoniewicz MR. 2017. Comprehensive analysis of  
1068 glucose and xylose metabolism in *Escherichia coli* under aerobic and  
1069 anaerobic conditions by <sup>13</sup>C metabolic flux analysis. *Metab Eng* 39:9–18.
- 1070 74. Revelles O, Millard P, Nougayrède J-P, Dobrindt U, Oswald E, Létisse F,  
1071 Portais J-C. 2013. The carbon storage regulator (Csr) system exerts a  
1072 nutrient-specific control over central metabolism in *Escherichia coli*  
1073 strain Nissle 1917. *PLoS ONE* 8:e66386.
- 1074 75. Spaans SK, Weusthuis RA, van der Oost J, Kengen SWM. 2015. NADPH-  
1075 generating systems in bacteria and archaea. *Front Microbiol* 6:742.
- 1076 76. Arfman N, Hektor HJ, Bystrykh LV, Govorukhina NI, Dijkhuizen L, Frank J.  
1077 1997. Properties of an NAD(H)-containing methanol dehydrogenase and

1078 its activator protein from *Bacillus methanolicus*. *Eur J Biochem* 244:426–  
1079 433.

## 1080 **Figure descriptions**

1081 **Fig. 1: Flux map of *B. methanolicus* central metabolism relative to**  
1082 **substrate intake for methanol (A), mannitol (B) and arabitol (C).** The  
1083 thickness of the reaction lines represent the flux proportions relative to  
1084 substrate incorporation into the metabolism: hps (A), Manupt (B), Araupt (C).  
1085 Flux proportions were averaged among the biological replicates ( $n_{\text{methanol}}=2$ ,  
1086  $n_{\text{arabitol}} = n_{\text{mannitol}} = 3$ ). The direction of the reaction arrows represent the  
1087 estimated net flux directionality. Large grey arrows represent a flux directed  
1088 toward amino acid synthesis and biomass requirements for growth. Pathways  
1089 discussed in the text are represented by a background patch of color.  
1090 Metabolites are represented by circles and have a solid bottom half if they  
1091 are duplicated on the same panel, as per recommended by the SBGN  
1092 standard. Metabolites subjected to experimental measurement of  $^{13}\text{C}$   
1093 labelling are marked by a yellow box. Some intermediate metabolites are not  
1094 needed for  $^{13}\text{C}$ -MFA and are consequently lumped in mannitol and arabitol  
1095 models (B, C); the same metabolites can be explicitly modelled in methanol  
1096 model (A) since non-stationary  $^{13}\text{C}$ -MFA requires all intermediates pools (e.g.:  
1097 G3P, Cit, Aco). Reactions toward amino acid pools and biomass are not  
1098 represented.

1099 **Fig. 2: Alternative assimilation pathways of D-arabitol with an**  
1100 **example of the measured and expected labeling of Rib5P.** Arabitol

1101 entry point into the metabolism is expected to be Rib5P or Xyl5P,  
1102 depending on the substrate specificity of the PTS system and the arabitol  
1103 phosphate dehydrogenase. Taking [5-<sup>13</sup>C]arabitol as an example, we show  
1104 that the labeling of downstream metabolites can be used to identify which  
1105 pathway is operating *in vivo* (Rib5P, orange; Xyl5P, blue). We exemplify our  
1106 approach with one data point: the NMR specific enrichment of Rib5P and the  
1107 associated estimates from the best fit of different scenarios in which PTS1 or  
1108 PTS5 are allowed to carry flux in the model (barplot). Unlike the others, the  
1109 model in which only PTS5 was allowed to carry flux did not fit the data (red  
1110 crossmark, ✕). Circles are carbon atoms: solid for <sup>13</sup>C (●), empty for <sup>12</sup>C (○),  
1111 dotted when irrelevant.

1112 **Fig. 3: Estimated absolute fluxes (mmol/gDCW/h) for methanol**  
1113 **(blue), mannitol (orange) and arabitol (green).** The bars represent the  
1114 average of the estimated absolute net flux for each biological replicate (black  
1115 dot), and the error bar is the associated standard deviation ( $n_{\text{methanol}} = 2$ ,  
1116  $n_{\text{arabitol}} = n_{\text{mannitol}} = 3$ ).

1117 **Fig. 4: Estimated absolute rates of production and consumption of**  
1118 **NADPH, NADH/FADH<sub>2</sub>, and ATP.** Rates (mmol/gDCW/h) are calculated as  
1119 the sum of the estimated flux of the reactions modeled in the MFA that are  
1120 expected to produce (positive value) or consume (negative value) those  
1121 cofactors. Values are averaged over the biological replicates and the error  
1122 bars are the associated standard deviation ( $n_{\text{methanol}} = 2$ ,  $n_{\text{arabitol}} = n_{\text{mannitol}} = 3$ ).  
1123 The growth requirements (“biomass”, red) are computed from measures on  
1124 *B. subtilis* (mmol/gDCW) and the growth rates we observed. Production and

1125 consumption rates should be balanced in our conditions, so we mark putative  
1126 production/consumption rates as “unknown” to complete the balance when  
1127 needed. The full production of NADH and FADH<sub>2</sub> is assumed to be consumed  
1128 in the respiratory chain (“oxidative phosphorylation”) and to produce ATP  
1129 (with  $P/O_{\text{NADH}} = 1.5$ ,  $P/O_{\text{FADH}_2} = 1$ ). We modeled the PTS systems of mannitol  
1130 and arabitol as consumers of one equivalent ATP (in “uptake”). NADPH  
1131 production: glucose 6-phosphate dehydrogenase (*zwf*), phosphogluconate  
1132 dehydrogenase (*gnd*), isocitrate dehydrogenase (*idh*), and  
1133 methylenetetrahydrofolate dehydrogenase from the linear detoxification  
1134 pathway (detox). NADH production: glyceraldehyde-3-phosphate  
1135 dehydrogenase (*pgk*), pyruvate dehydrogenase (*pdh*), 2-oxoglutarate  
1136 dehydrogenase (*akgdh*), malate dehydrogenase (assimilated to *fum*),  
1137 methanol, mannitol and arabitol dehydrogenase (*mdh*, *manupt*, *araupt*), and  
1138 formate dehydrogenase from the linear detoxification pathway (detox).  
1139 FADH<sub>2</sub> production: succinate dehydrogenase (*fum*). ATP consumption: 6-  
1140 phosphofructokinase (*pfk*), PTS systems of mannitol and arabitol (*manupt*,  
1141 *araupt*). ATP production: phosphoglycerate kinase (*pgk*), pyruvate kinase  
1142 (*pyk*), succinyl-CoA synthetase (assimilated to *akgdh*), acetate kinase  
1143 (*out\_Ac*), and formate-tetrahydrofolate ligase from the linear detoxification  
1144 pathway (detox).

## 1145 Tables

1146 **Table 1.** Strains, primers and plasmids used in this study.

| Strain, plasmid or primer   | Relevant characteristics                                                                                                                                                   | Reference  |
|-----------------------------|----------------------------------------------------------------------------------------------------------------------------------------------------------------------------|------------|
| <b>Strains</b>              |                                                                                                                                                                            |            |
| <i>E. coli</i> DH5 $\alpha$ | F <sup>-</sup> <i>thi-1 endA1 hsdR17(r<sup>-</sup> m<sup>-</sup>) supE44 <math>\Delta</math>lacU169 (<math>\phi</math>80lacZ<math>\Delta</math>M15) recA1 gyrA96 relA1</i> | (43)       |
| <i>E. coli</i> BL21 (DE3)   | F <sup>-</sup> <i>ompT hsdSB(r<sub>B</sub><sup>-</sup> m<sub>B</sub><sup>-</sup>) gal dcm</i> (DE3)                                                                        | (44)       |
| <i>B. methanolicus</i> MGA3 | Wild type strain (ATCC 53907)                                                                                                                                              | (11)       |
| <b>Plasmids</b>             |                                                                                                                                                                            |            |
| pET16b                      | Amp <sup>R</sup> ; overproduction of Novagen decahistidine-tagged proteins in <i>E. coli</i> (pBR322 oriVE.c., PT7, lacI)                                                  |            |
| pET16b- <i>atID</i>         | pET16b derivative for the production of <i>B. methanolicus</i> His <sub>10</sub> -tagged AtID from <i>E. coli</i> BL21 (DE3)                                               | This study |

---

pET16b-*atIF*                      pET16b derivative for the This study  
production of *B. methanolicus*  
His<sub>10</sub>-tagged AtIF from *E. coli*  
BL21 (DE3)

---

| <b>Primers</b> | <b>Sequence [5' → 3']</b>                                    | <b>Characteristics</b>                                     |
|----------------|--------------------------------------------------------------|------------------------------------------------------------|
| P192           | agcttcctttcgggctttgtagcagcc<br>gTTAATCAATAGGTGTCAACAAT<br>AC | Amplification of<br><i>atID</i> for pET16b-<br><i>atID</i> |
| P193           | gccatatcgaaggctcgtcatatgctcg<br>agATGAAAGCTTTAGTCAAAAA<br>AG |                                                            |
| P194           | agcttcctttcgggctttgtagcagcc<br>gTTATGATTTTTCTGGATGGAAG       | Amplification of<br><i>atIF</i> for pET16b-<br><i>atIF</i> |
| P195           | gccatatcgaaggctcgtcatatgctcg<br>agATGAAAGCATTAAAGCTGTA<br>TG |                                                            |

---

1147 Amp<sup>R</sup>: ampicillin resistance; overlapping regions are shown in lower case.

1148 **Table 2.** Kinetic data of purified AtID and AtIF

| <b>Condition<sup>a</sup>: protein, substrate, cofactor<sup>b</sup></b> | <b>Substrate <math>K_M</math> (mM)</b> | <b><math>V_{max}</math> (U mg<sup>-1</sup>)<sup>c</sup></b> | <b><math>V_{max} / K_M</math></b> |
|------------------------------------------------------------------------|----------------------------------------|-------------------------------------------------------------|-----------------------------------|
| AtID, Xyl5P, NADH                                                      | 0.07 ± 0.03                            | 1.33 ± 0.23                                                 | 19                                |
| AtID, Ribu5P, NADH                                                     | 1.21 ± 0.42                            | 0.49 ± 0.06                                                 | 0.4                               |
| AtIF, Xyl5P, NADH                                                      | 0.18 ± 0.05                            | 0.11 ± 0.01                                                 | 0.6                               |

1149 <sup>a</sup> The following reactions were also analysed, but no significant activity (i.e. < 0.05 U mg<sup>-1</sup>)  
 1150 could be detected: AtID, Ribu5P, NADPH; AtIF, Xyl5P, NADPH; AtIF, Ribu5P, NADH; AtIF,  
 1151 Ribu5P, NADPH.

1152 <sup>b</sup> Cofactor  $K_M$  values were analysed using 0.2 mM Xyl5P and were 0.01 ± 0.01 and 0.11 ±  
 1153 0.09 for NADH and NADPH, respectively.

1154 <sup>c</sup> The  $V_{max}$  for AtID, Xyl5P, NADPH was calculated using 0.2 mM of substrate and 0.3 mM of  
 1155 cofactor, and resulted in 0.24 ± 0.06 U mg<sup>-1</sup>.

1156

1157 **Table 3: Physiological parameters of *B. methanolicus* cultures used**

1158 **for Metabolic Flux Analysis.** Growth rate and biomass quantities were  
 1159 deduced from OD<sub>600</sub> measurements in the exponential growth phase. Carbon  
 1160 source evolution rates were measured from supernatant samples and  
 1161 analyzed by NMR. Labelled CO<sub>2</sub> was monitored by MS in the bioreactor's  
 1162 outgoing gas flow. All cultures were aerobic. n.a.: not measured; n.d.: not  
 1163 detected. The uncertainties shown are standard errors between biological  
 1164 replicates.

| <b>Method</b>                                        | <b>Methanol (CH<sub>3</sub>OH)</b>        | <b>Mannitol (C<sub>6</sub>H<sub>14</sub>O<sub>6</sub>)</b> | <b>Arabitol (C<sub>5</sub>H<sub>12</sub>O<sub>5</sub>)</b>        |                                      |
|------------------------------------------------------|-------------------------------------------|------------------------------------------------------------|-------------------------------------------------------------------|--------------------------------------|
|                                                      | <sup>13</sup> C INST-MFA bioreactor (n=2) | [1- <sup>13</sup> C] MFA flask (n=3)                       | Mix. [1- <sup>13</sup> C] & [2- <sup>13</sup> C] MFA, flask (n=3) | [5- <sup>13</sup> C] MFA flask (n=3) |
| <b>Growth rate</b><br>[h <sup>-1</sup> ]             | 0.46 ± 0.002                              | 0.36 ± 0.02                                                | 0.15 ± 0.004                                                      | 0.1411 ± 0.02                        |
| <b>Biomass yield</b><br>[gDCW/gSubstrate]            | 0.55 ± 0.01                               | 0.34 ± 0.08                                                | 0.19 ± 0.02                                                       | 0.23 ± 0.02                          |
| <b>C source</b><br>[mmolC/gDCW/h]                    | 21.9 ± 2.2                                | 36 ± 7.3                                                   | 21.4 ± 1.2                                                        | 24.5 ± 0.75                          |
| <b>CO<sub>2</sub><sub>out</sub></b><br>[mmol/gDCW/h] | 7.6 ± 0.04                                | n.a.                                                       | n.a.                                                              | n.a.                                 |
| <b>Acetate<sub>out</sub></b><br>[mmol/gDCW/h]        | n.d.                                      | 1.75 ± 0.32                                                | n.d.                                                              | n.d.                                 |

1165

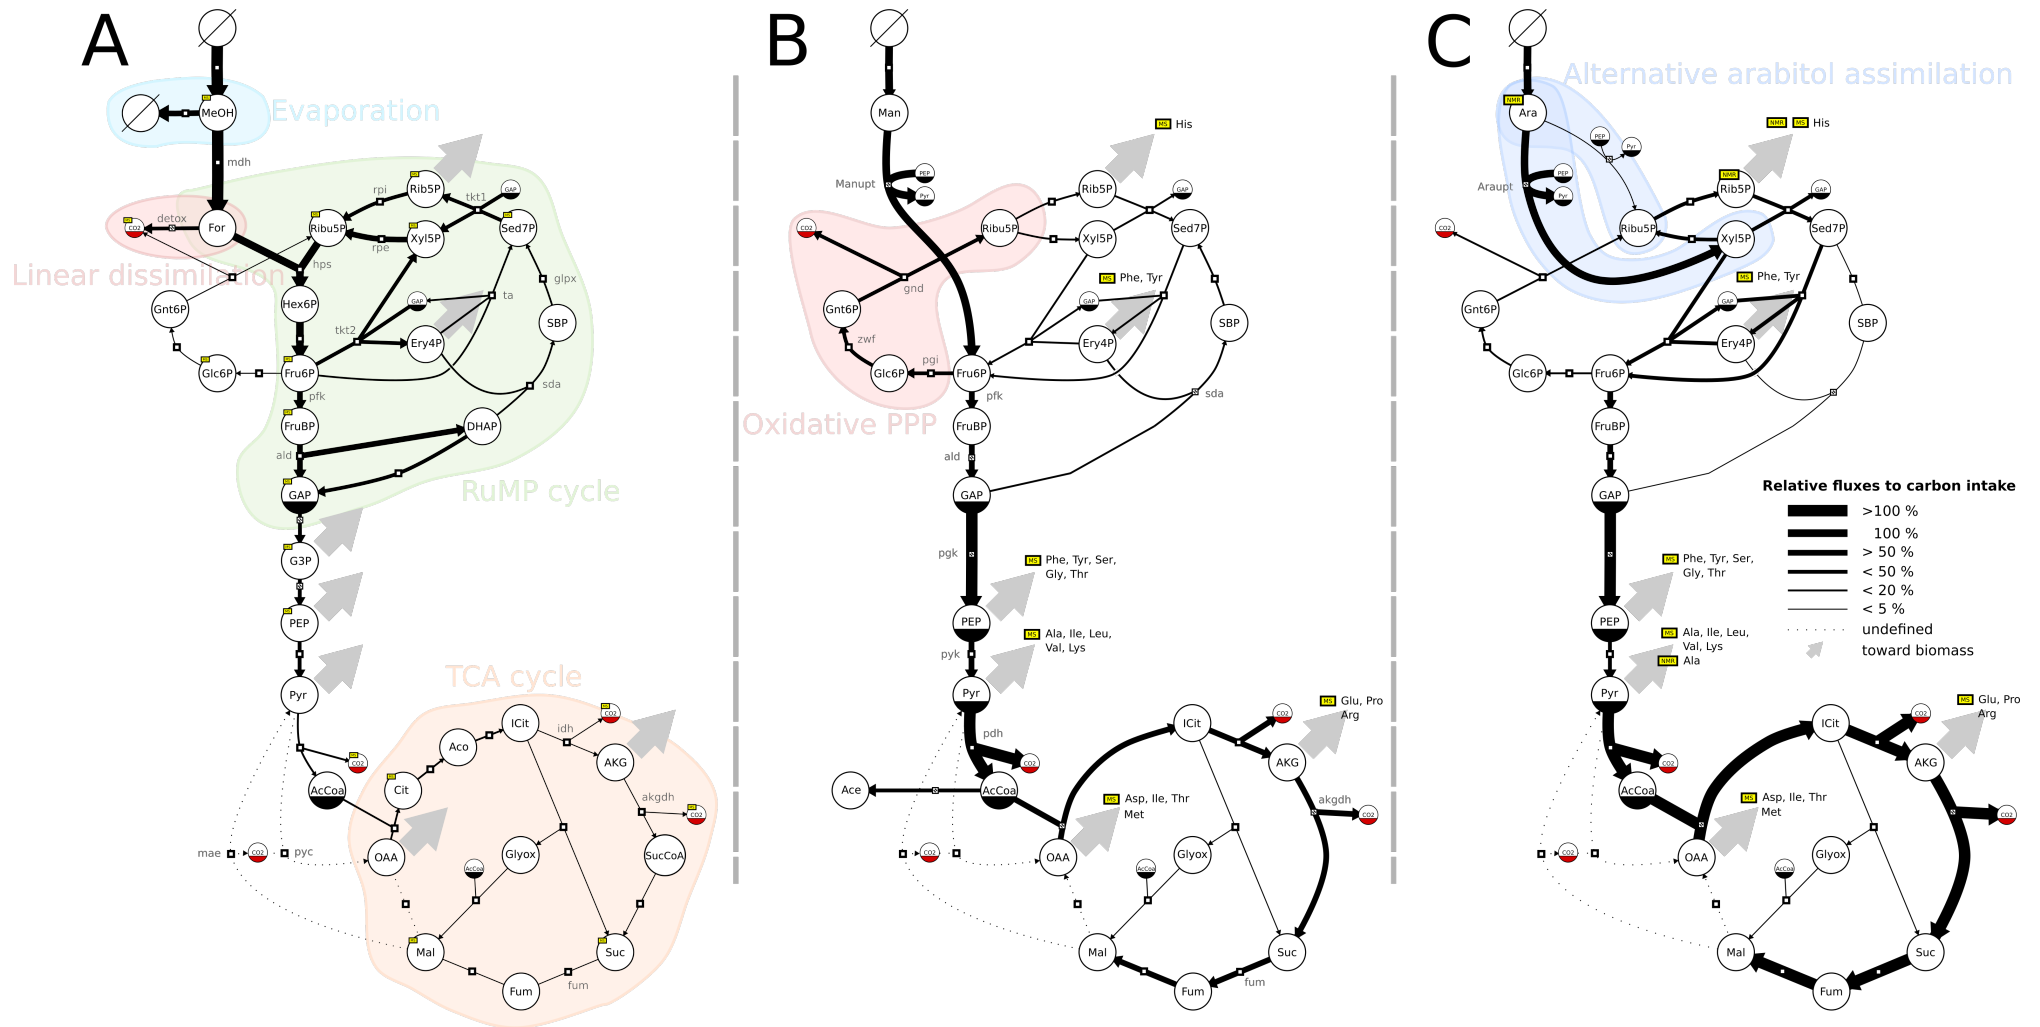

**Fig. 1: Flux map of *B. methanolicus* central metabolism relative to substrate intake for methanol (A), mannitol (B) and arabitol (C).** The thickness of the reaction lines represent the flux proportions relative to substrate incorporation into the metabolism: hps (A), Manupt (B), Araupt (C). Flux proportions were averaged among the biological replicates ( $n_{\text{methanol}}=2$ ,  $n_{\text{arabitol}} = n_{\text{mannitol}} = 3$ ). The direction of the reaction arrows represent the estimated net flux directionality. Large grey arrows represent a flux directed toward amino acid synthesis and biomass requirements for growth. Pathways discussed in the text are represented by a background patch of color. Metabolites are represented by circles and have a solid bottom half if they are duplicated on the same panel, as per recommended by the SBGN standard. Metabolites subjected to experimental measurement of <sup>13</sup>C labeling are marked by a yellow box. Some intermediate metabolites are not needed for <sup>13</sup>C-MFA and are consequently lumped in mannitol and arabitol models (B, C); the same metabolites can be explicitly modeled in methanol model (A) since non-stationary <sup>13</sup>C-MFA requires all intermediates pools (e.g.: G3P, Cit, Aco). Reactions toward amino acid pools and biomass are not represented.



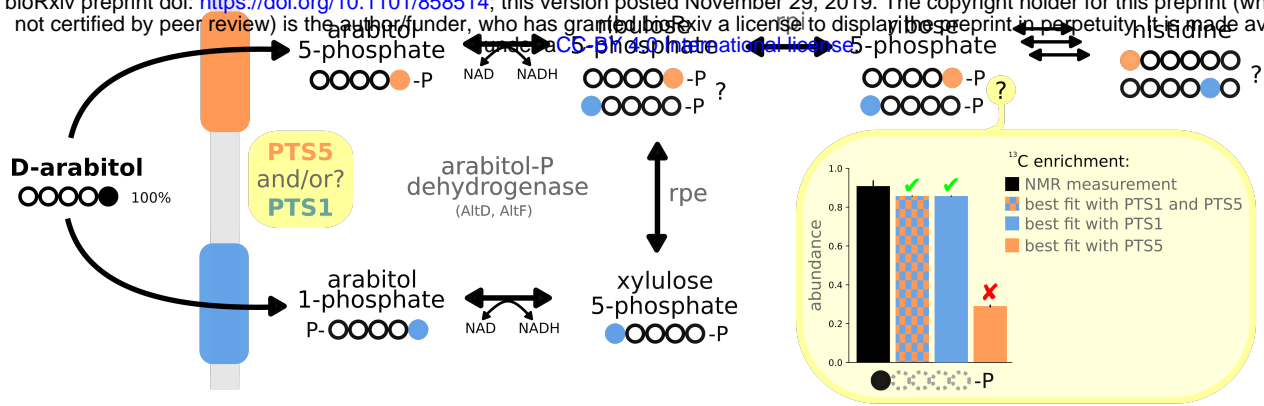

**Fig. 2: Alternative assimilation pathways of D-arabitol with an example of the measured and expected labeling of Rib5P.** Arabitol entry point into the metabolism is expected to be Rib5P or Xyl5P, depending on the substrate specificity of the PTS system and the arabitol phosphate dehydrogenase. Taking [5- $^{13}\text{C}$ ]arabitol as an example, we show that the labeling of downstream metabolites can be used to identify which pathway is operating *in vivo* (Rib5P, orange; Xyl5P, blue). We exemplify our approach with one data point: the NMR specific enrichment of Rib5P and the associated estimates from the best fit of different scenario in which PTS1 or PTS5 are allowed to carry flux in the model (barplot). Unlike the others, the model in which only PTS5 was allowed to carry flux did not fit the data (red cross-mark, ✗). Circles are carbon atoms: solid for  $^{13}\text{C}$  (●), empty for  $^{12}\text{C}$  (○), dotted when irrelevant.

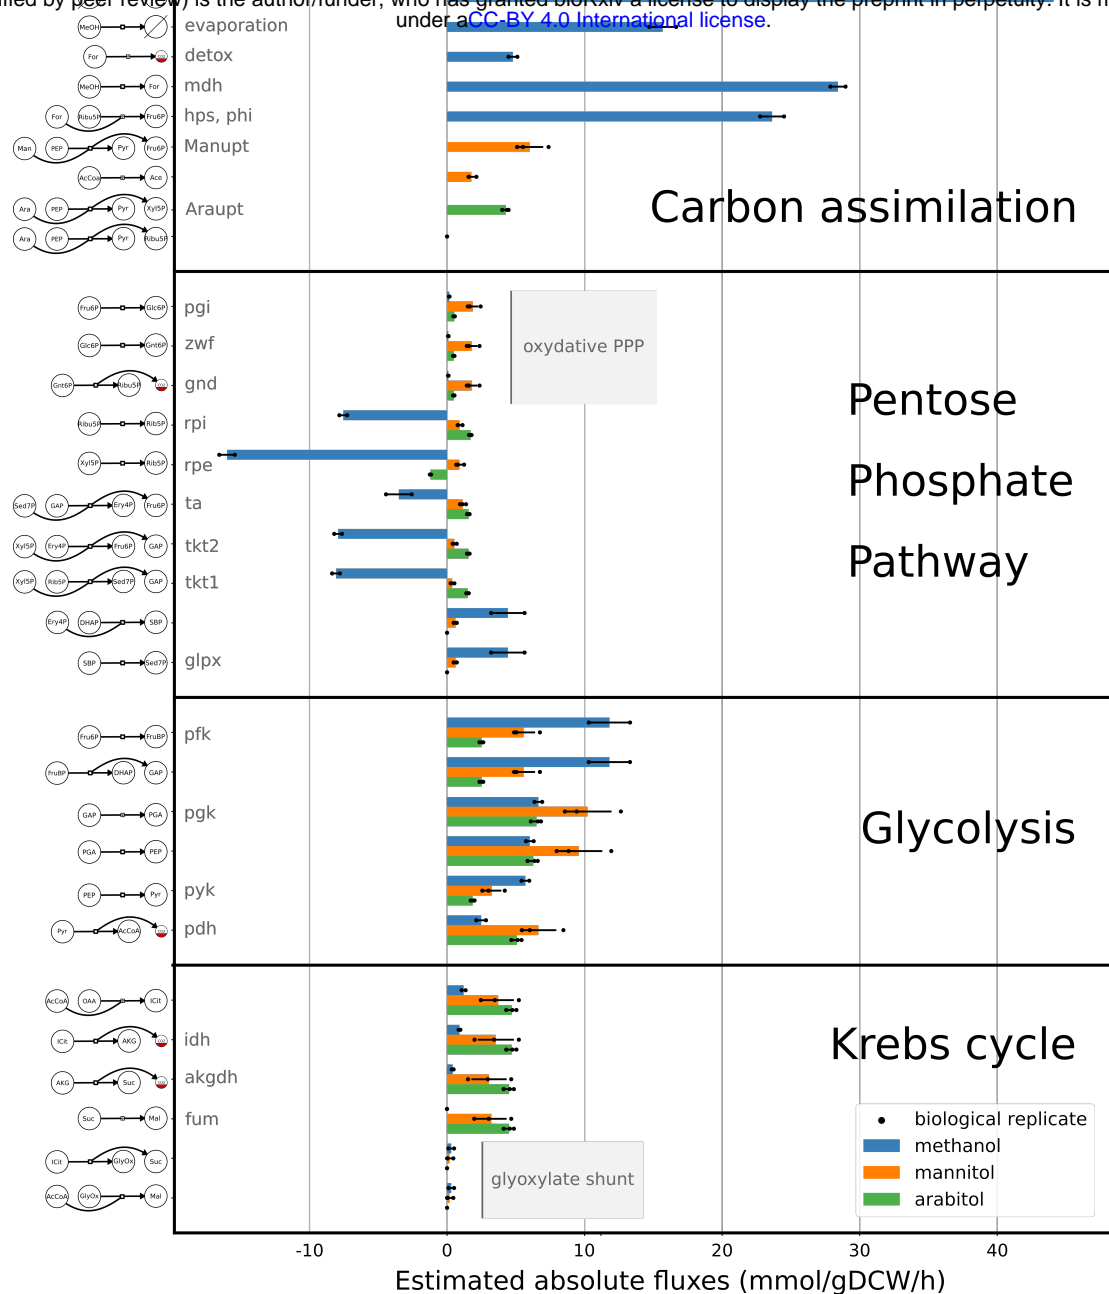

**Fig. 3: Estimated absolute fluxes (mmol/gDCW/h) for methanol (blue), mannitol (orange) and arabitol (green).** The bars represent the average of the estimated absolute net flux for each biological replicate (black dot), and the error bar is the associated standard deviation ( $n_{\text{methanol}}=2$ ,  $n_{\text{arabitol}} = n_{\text{mannitol}} = 3$ ).

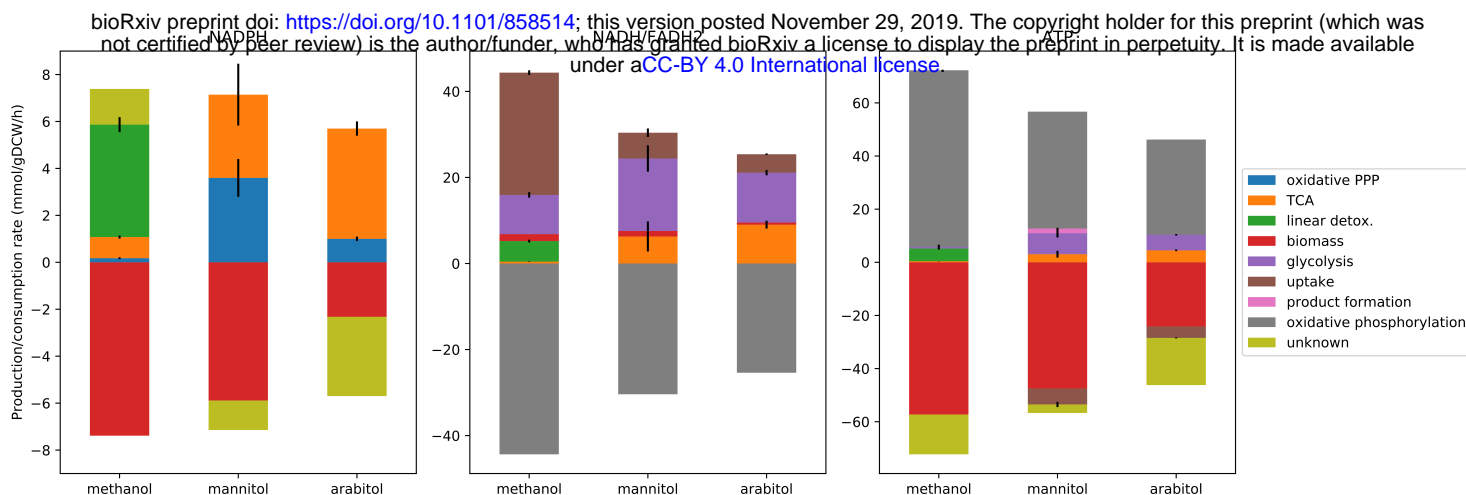

**Fig. 4: Estimated absolute rates of production and consumption of NADPH, NADH/FADH<sub>2</sub>, and ATP.**

Rates (mmol/gDCW/h) are calculated as the sum of the estimated flux of the reactions modeled in the MFA that are expected to produce (positive value) or consume (negative value) those cofactors. Values are averaged over the biological replicates and the error bars are the associated standard deviation ( $n_{\text{methanol}}=2$ ,  $n_{\text{arabinol}} = n_{\text{mannitol}} = 3$ ). The growth requirements (“biomass”, red) are computed from measures on *B. subtilis* (mmol/gDCW) and the growth rates we observed. Production and consumption rates should be balanced in our conditions, so we mark putative production/consumption rates as “unknown” to complete the balance when needed. The full production of NADH and FADH<sub>2</sub> is assumed to be consumed in the respiratory chain (“oxidative phosphorylation”) and to produce ATP (with  $P/O_{\text{NADH}}=1.5$ ,  $P/O_{\text{FADH}_2}=1$ ). We modeled the PTS systems of mannitol and arabinol as consumers of one equivalent ATP (in “uptake”). NADPH production: glucose-6-phosphate dehydrogenase (*zwf*), phosphogluconate dehydrogenase (*gnd*), isocitrate dehydrogenase (*idh*), and methylenetetrahydrofolate dehydrogenase from the linear detoxification pathway (detox). NADH production: glyceraldehyde-3-phosphate dehydrogenase (*pgk*), pyruvate dehydrogenase (*pdh*), 2-oxoglutarate dehydrogenase (*akgdh*), malate dehydrogenase (assimilated to *fum*), methanol mannitol and arabinol dehydrogenase (*mdh*, *manupt*, *araupt*), and formate dehydrogenase from the linear detoxification pathway (detox). FADH<sub>2</sub> production: succinate dehydrogenase (*fum*). ATP consumption: 6-phosphofructokinase (*pfk*), PTS systems of mannitol and arabinol (*manupt*, *araupt*). ATP production: phosphoglycerate kinase (*pgk*), pyruvate kinase (*pyk*), succinyl-CoA synthetase (assimilated to *akgdh*), acetate kinase (*out\_Ac*), and formate-tetrahydrofolate ligase from the linear detoxification pathway (detox).
